# To isolate or not to isolate: The impact of changing behavior on COVID-19 transmission

August 30, 2020

Folashade B. Augusto<sup>a1</sup>, Igor V. Erovenko<sup>f</sup>, Alexander Fulk<sup>a</sup>, Qays Abu-Saymeh<sup>a</sup>,  
Daniel Romero-Alvarez<sup>a</sup>, Joan Ponce<sup>c</sup>, Suzanne Sindi<sup>d</sup>, Omayra Ortega<sup>e</sup>  
Jarron M. Saint Onge<sup>a,b</sup>, A. Townsend Peterson<sup>a</sup>

<sup>a</sup>University of Kansas, Lawrence, KS 66045 USA <sup>b</sup>University of Kansas Medical Center, Kansas City, KS 66160 USA

<sup>c</sup>Purdue University, West Lafayette, IN 47907 USA, <sup>d</sup>University of California Merced, Merced, CA 95343 USA

<sup>e</sup>Sonoma State University, Rohnert Park, CA 94928, <sup>f</sup>University of North Carolina at Greensboro, Greensboro, NC 27412 USA

## Abstract

The COVID-19 pandemic has caused more than 25 million cases and 800 thousand deaths worldwide to date. Neither vaccines nor therapeutic drugs are currently available for this novel coronavirus. All measures to prevent the spread of COVID-19 are thus based on reducing contact between infected and susceptible individuals. Most of these measures such as quarantine and self-isolation require voluntary compliance by the population. However, humans may act in their (perceived) self-interest only. We construct a mathematical model of COVID-19 transmission with quarantine and hospitalization coupled with a dynamic game model of adaptive human behavior. Susceptible and infected individuals adopt various behavioral strategies based on perceived prevalence and burden of the disease and sensitivity to isolation measures, and they evolve their strategies using a social learning algorithm (imitation dynamics). This results in complex interplay between the epidemiological model, which affects success of different strategies, and the game-theoretic behavioral model, which in turn affects the spread of the disease. We found that the second wave of the pandemic, which has been observed in the US, can be attributed to rational behavior of susceptible individuals, and that multiple waves of the pandemic are possible if the rate of social learning of infected individuals is sufficiently high. To reduce the burden of the disease on the society, it is necessary to incentivize such altruistic behavior by infected individuals as voluntary self-isolation.

**Key words:** COVID-19, isolation and quarantine, game theory, human behavior, imitation dynamics, perception of risk

---

<sup>1</sup>Corresponding Author email: [fbagusto@gmail.com](mailto:fbagusto@gmail.com)

# 1 Introduction

COVID-19 is a respiratory disease caused by a recently discovered, novel coronavirus SARS-CoV-2. Since its discovery in Wuhan, China, in 2019, COVID-19 has led to over 25 million cases globally, over 800 thousand deaths, and 16 million recovered. Spreading globally, including to vulnerable countries with challenging healthcare infrastructures, the virus is now of international concern and has been deemed a pandemic by the World Health Organization (WHO).

According to COVID-19 data from Johns Hopkins University [31], the United States is currently the epicenter of the outbreak, with nearly 5 million confirmed cases and over 180 thousand reported deaths. Additionally, South America, India, and Africa are experiencing rising in cases and deaths from the virus. Brazil has over 3 million confirmed cases with over 120 thousand deaths; India has over 3 million confirmed cases with over 62 thousand deaths; and South Africa has over 600 thousand confirmed cases and 13 thousand deaths. These statistics point towards a grim realization that the world might be losing the battle to contain and control the pandemic.

COVID-19 is transmitted person-to-person *via* respiratory droplets and aerosols or by touching contaminated surfaces and objects containing the virus [5]; the virus can live for hours or days on contaminated surfaces and objects [10]. The incubation period for those exposed to COVID-19 varies from 2 to 12 days [11, 14]; onset of symptoms is often seen earlier in people with pre-existing health conditions and compromised immune systems. There is a wide range of symptoms observed in patients with COVID-19, including fever, shortness of breath, dry cough, headache, nausea, sore throat, chest pain, loss of taste or smell, diarrhea, and severe fatigue [14].

While the risk of severe complications and death from COVID-19 is higher among the older population and people with pre-existing conditions, younger adults and children remain at risk. In China, 90% of children were asymptomatic and only 5.9% had severe infections (compared to 20% among adults with the disease) [23]. In Italy, 10% of COVID-19 infected people in ICUs are 20–40 years old [16, 28]. Nonetheless, many young people are not taking the pandemic seriously [28]. In the United States, there have been numerous examples of young adults ignoring these warnings and underestimating the disease risk either to themselves or to older individuals around them. For instance, a group of young adults in Kentucky threw a Coronavirus Party [49] and other gathered in an over-crowded pool party without social distancing [21].

Since neither vaccines nor therapeutics are yet available for this virus, public health responses require social policies. Various regions have tried distinct responses including social distancing, school and event closings, and travel bans. Social distancing guidelines as suggested by the Centers for Disease Control and Prevention (CDC) and the World Health Organization states that individuals outside their homes should be six feet apart from all other people and to wear a face mask at all times. The guidelines further recommend that people frequently wash their hands for at least 20 seconds, even in their homes, as research has shown that soap kills the virus and reduces ones chance of getting infected [13]. Infected individuals and suspected cases are quarantined or advised to self-isolate. However, little is known about best management strategies for limiting further transmission and spread. Furthermore, the success of these preventive measures depend on voluntary compliance by the population, humans may act in their (perceived) self-interest only.

69           The objective of this study is to gain insight into the role of human behavior in  
70 modulating the spread and prevalence of COVID-19. We construct a mathematical  
71 model of COVID-19 transmission with quarantine and hospitalization, and we couple  
72 this model with a dynamic game model of adaptive human behavior. Susceptible  
73 individuals seek to protect themselves from the infection, and they consider supporting  
74 school and workplace closures. Infected individuals cannot protect themselves, but  
75 they may try to protect the rest of the population by electing to self-isolate from other  
76 people. Individuals adopt strategies based on the perceived prevalence and burden  
77 of the disease and on sensitivity to the social isolation measures. They may also  
78 imitate strategies of other individuals via a social learning process (imitation dynamics  
79 [29]) if these individuals are more successful according to appropriately defined game  
80 payoff functions. This results in a complex interplay between the disease spread and  
81 human behavioral response, which affect each other in a feedback loop. We try to  
82 identify behavioral factors that reduce the scale of the pandemic, and propose possible  
83 measures to address these factors for the benefit of the entire society.

## 84           **2 Results**

85           We begin by analysing a baseline model of COVID-19 transmission with quarantine and  
86 hospitalization (described in Section 4.1). We then analyze two models of dynamically  
87 adapting human behavior within the baseline model (described in Section 4.2): support  
88 for school and workplace closures by susceptible individuals to protect themselves from  
89 infection, and self-isolation by symptomatically infected individuals to protect others  
90 from infection. We analyze the effect of each type of behavior on the spread and  
91 prevalence of COVID-19 separately and jointly.

### 92           **2.1 Baseline COVID-19 model**

93           We construct a model of COVID-19 transmission with quarantine and hospitalization  
94 in Section 4.1. We follow the natural history of the infection [42, 53] and partition  
95 the population according to their disease status as susceptible ( $S(t)$ ), exposed ( $E(t)$ ),  
96 asymptotically infected ( $A(t)$ ), symptomatically infected ( $I(t)$ ), quarantined ( $Q(t)$ ),  
97 hospitalized ( $H(t)$ ), and removed ( $R(t)$ ) individuals. The flow diagram depicting the  
98 transition from one state to the other as the disease progresses through the population  
99 is shown in Figure 1, and the associated state variables and parameters are described  
100 in Tables 1.

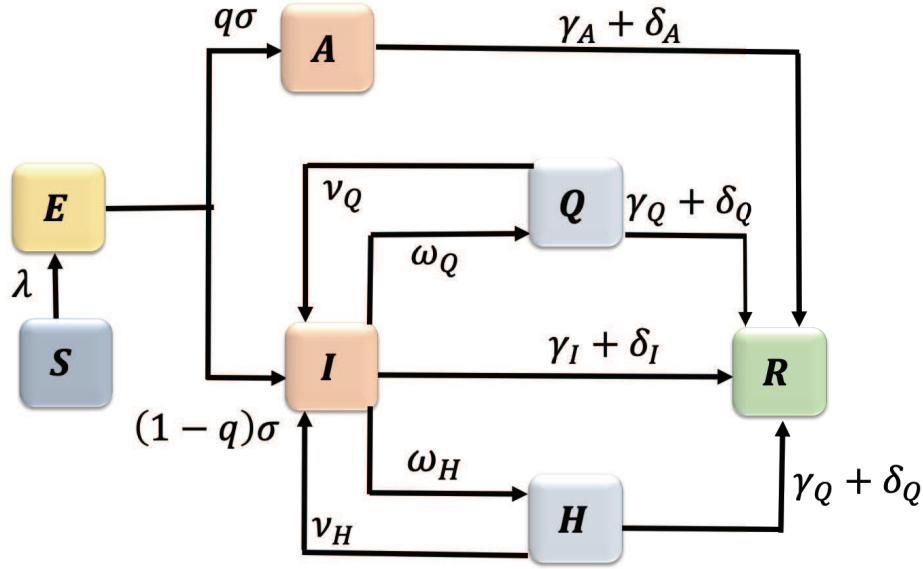

Figure 1: Flow diagram of the COVID-19 model (1).

Table 1: Description of the variables and parameters of the COVID-19 model (1).

| Variable                                 | Description                                                                             |
|------------------------------------------|-----------------------------------------------------------------------------------------|
| $S(t)$                                   | Proportion of susceptible individuals                                                   |
| $E(t)$                                   | Proportion of exposed individuals                                                       |
| $A(t)$                                   | Proportion of asymptotically infected individuals                                       |
| $I(t)$                                   | Proportion of symptomatically infected individuals                                      |
| $Q(t)$                                   | Proportion of quarantined individuals                                                   |
| $H(t)$                                   | Proportion of hospitalized individuals                                                  |
| $R(t)$                                   | Proportion of removed individuals                                                       |
| Parameter                                | Description                                                                             |
| $\beta$                                  | Infection rate                                                                          |
| $\eta_A, \eta_Q, \eta_H$                 | Modification parameters for asymptomatic, quarantined, and hospitalized infection rates |
| $q$                                      | Proportion of exposed developing asymptomatic infections                                |
| $\sigma$                                 | Disease progression rate from the exposed to infectious                                 |
| $\gamma_I, \gamma_A, \gamma_Q, \gamma_H$ | Recovery rates of symptomatic, asymptomatic, quarantined, and hospitalized individuals  |
| $\omega_Q, \omega_H$                     | Quarantine and hospitalization rates                                                    |
| $\nu_Q$                                  | Quarantine violation rate                                                               |
| $\nu_H$                                  | Hospital discharge rate                                                                 |
| $\delta_I, \delta_A, \delta_Q, \delta_H$ | Death rates of symptomatic, asymptomatic, quarantined, and hospitalized individuals     |

101 The associated reproduction number [22, 48] of the baseline COVID-19 model (1)  
 102 with quarantine and hospitalization, denoted by  $\mathcal{R}_0$ , is given by

$$\mathcal{R}_0 = \mathcal{R}_I + \mathcal{R}_A,$$

103 where

$$\mathcal{R}_I = \frac{(1-q)\beta(k_3\eta_H\omega_H + k_4\eta_Q\omega_Q + k_3k_4)}{(k_2k_3k_4 - k_3\nu_H\omega_H - k_4\nu_Q\omega_Q)} \quad \text{and} \quad \mathcal{R}_A = \frac{q\beta\eta_A}{k_1},$$

104 with  $k_1 = \gamma_A + \delta_A$ ,  $k_2 = \gamma_I + \omega_Q + \omega_H + \delta_I$ ,  $k_3 = \nu_Q + \gamma_Q + \delta_Q$ , and  $k_4 = \nu_H + \gamma_H + \delta_H$ .  
 105 The quantity  $\mathcal{R}_I$  is the number of secondary infections produced by symptomatic in-  
 106 dividuals, while  $\mathcal{R}_A$  is the number of secondary infections generated by asymptomatic  
 107 individuals. Together, the epidemiological quantity  $\mathcal{R}_0$ , measures the average number  
 108 of COVID-19 secondary infections produced when a single infected individual is in-  
 109 troduced into a completely susceptible population [22, 48]. Hence, COVID-19 can be  
 110 effectively controlled in the population if the reproduction number ( $\mathcal{R}_0$ ) can be reduced  
 111 to (and maintained at) a value less than unity (i.e.,  $\mathcal{R}_0 < 1$ ).

112 We computed the numerical value of the reproduction number  $\mathcal{R}_0$  using the pa-  
 113 rameter values tabulated in Table 3. Some of the parameter values in Table 3 were  
 114 fitted based on the COVID-19 data for Arizona from January 26 to July 6 [31] (see  
 115 Figure 12), while others were obtained from the literature. Using these parameter  
 116 estimates, we obtain  $\mathcal{R}_0 \approx 1.84$  for the COVID-19 outbreak in Arizona.

### 117 2.1.1 Impact of quarantine and hospitalization

118 Here, we investigate the impact of quarantine and hospitalization on the disease trans-  
 119 mission. We vary the values of the quarantine rate  $\omega_Q$ , hospitalization rate  $\omega_H$ , quar-  
 120 antine violation rate  $\nu_Q$ , early discharge of symptomatic infectious individuals from  
 121 hospitals rate  $\nu_H$ , and the infection rate  $\beta$  in pairs and examine the effect of these  
 122 variations on the value of  $\mathcal{R}_0$ .

123 Figure 2(a) shows that increasing quarantine and hospitalization rates reduces the  
 124 value of  $\mathcal{R}_0$ , but the disease burden is still high because the values of  $\mathcal{R}_0$  are greater  
 125 than one. However, Figure 2(b) shows that the values of  $\mathcal{R}_0$  can be kept below 1 as  
 126 long as the values of  $\beta$  do not exceed a certain threshold ( $\beta \approx 0.22$ ), and this outcome  
 127 does not depend on the quarantine and hospitalization rates (see also Figure 13(a)).  
 128 Using this lower level of the infection rate, we see in Figure 13(b) that  $\mathcal{R}_0$  can be kept  
 129 below 1 provided either the quarantine rate is above 0.4 or the hospitalization rate is  
 130 above 0.2.

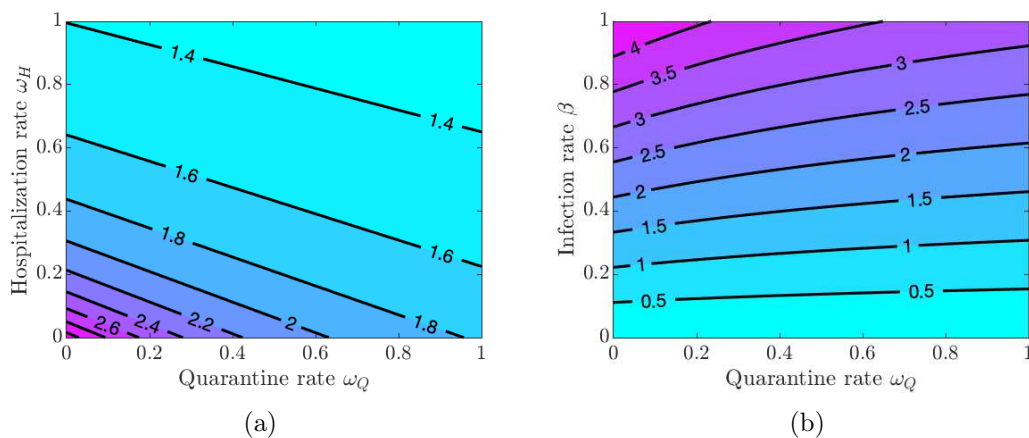

Figure 2: Contour plot of the COVID-19 reproduction number  $\mathcal{R}_0$  given in equation (1). (a) Varying quarantine rate  $\omega_Q$  and hospitalization rate  $\omega_H$ . (b) Varying quarantine rate  $\omega_Q$  and infection rate  $\beta$ .

131 If symptomatically infected individuals violate quarantine or are discharged from  
 132 the hospitals into the community due to overwhelmed demand for hospitalizations or  
 133 lack of resources, then the disease burden is high and containing the disease becomes  
 134 challenging as values of  $\mathcal{R}_0$  are greater than 1 for all values of  $\nu_Q$  and  $\nu_H$  (see Fig-  
 135 ure 3(a)). The situation is even worse if quarantine violation is varied along with  
 136 poor hygiene and disregard for social distancing, which increases the infection rate  $\beta$ .  
 137 Figures 3(b) and 14(a) show that  $\mathcal{R}_0 < 1$  as long as the values of  $\beta$  do not exceed  
 138 approximately the same threshold value  $\beta \approx 0.22$  as in the case of varying quarantine  
 139 and hospitalization rates. Figure 14(b) shows that the values of  $\mathcal{R}_0$  are below 1 pro-  
 140 vided the quarantine violation rate  $\nu_Q$  is below 0.7 or the hospital discharge rate  $\nu_H$  is  
 141 below 0.4. Moreover,  $\mathcal{R}_0 < 0.75$  if both  $\nu_Q$  and  $\nu_H$  are below 0.2.

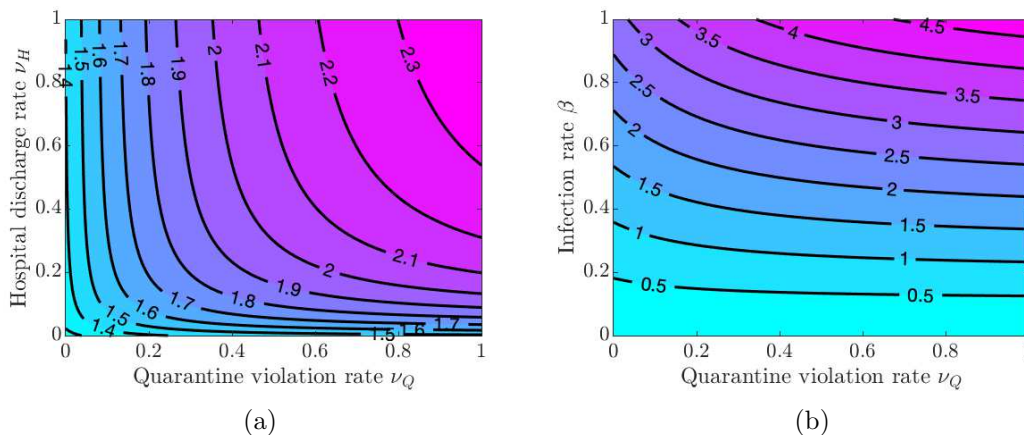

Figure 3: Contour plot of the COVID-19 reproduction number  $\mathcal{R}_0$  given in equation (1). (a) Varying quarantine violation rate  $\nu_Q$  and hospital discharge rate  $\nu_H$ . (b) Varying infection rate  $\beta$  and quarantine violation rate  $\nu_Q$ .

142 The results in Figures 2 and 3 show the importance of keeping the infection rate  $\beta$   
 143 low in order to reduce the disease burden. This can be achieved by maintaining proper  
 144 hygiene (washing hands as recommended), social distancing, and using facial masks.

### 145 2.1.2 Role of quarantined and hospitalized individuals

146 In this section, we investigate the impact of quarantine and hospitalization on the pro-  
 147 portion of infected individuals that exhibit symptoms of COVID-19. These individuals  
 148 span three compartments:  $I$ ,  $Q$ , and  $H$ . Figure 4(a) shows the effect of doubling the  
 149 quarantine ( $\omega_Q$ ) and hospitalization ( $\omega_H$ ) rates. The overall number of infections is  
 150 reduced, and the epidemic curve is flattened, while the peak of the infection is shifted  
 151 to later in time. On the other hand, doubling the quarantine violation ( $\nu_Q$ ) and hos-  
 152 pital discharge ( $\nu_H$ ) rates results in a higher infection peak that occurs sooner; see  
 153 Figure 4(b). These simulations further suggest, as expected, that a larger COVID-19  
 154 burden would be recorded if more people violate the quarantine rules, while increasing  
 155 the quarantine rate lowers the disease burden in the community.

156 In summary, the simulations of the COVID-19 model (1) with static human behavior  
 157 show that:

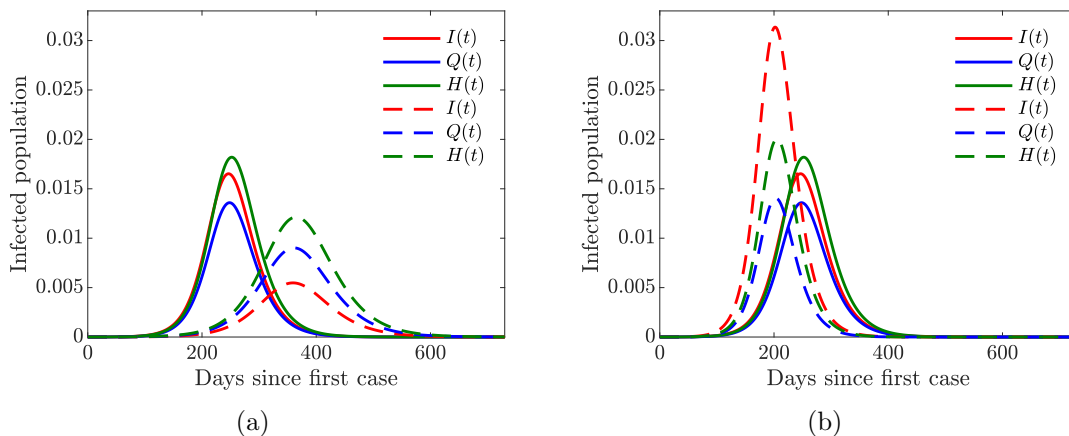

Figure 4: Simulation of the baseline COVID-19 model (1) for the proportions of symptomatically infected ( $I$ ), quarantined ( $Q$ ), and hospitalized ( $H$ ) individuals. Solid lines correspond to base values of the model parameters from Table 3. (a) Dashed lines correspond to double quarantine ( $\omega_Q$ ) and hospitalization ( $\omega_H$ ) rates (b) Dashed lines correspond to double quarantine violation ( $\nu_Q$ ) and hospital discharge ( $\nu_H$ ) rates.

- 158 (i) Increased quarantine violation and hospital discharge rates of those still infectious  
 159 due to overwhelmed hospital resources increases the disease burden leading to an  
 160 early epidemic peak.
- 161 (ii) Increasing quarantine and hospitalization rates decreases the disease burden and  
 162 reduces the epidemic peak. Moreover, these measures postpone the peak of the  
 163 infection, thus giving more time to prepare for the coming spike of the disease.

## 164 2.2 The COVID-19 model with dynamic human behavior

165 Perceived risk of infection drives human behavior and decisions during an epidemic.  
 166 These behaviors and decisions are derived from evaluating alternative decisions and  
 167 weighing related cost-benefit [44]. In this section, we analyze the effects of dynam-  
 168 ically changing human behavior by susceptible and symptomatically infected individuals  
 169 within the baseline COVID-19 model (1); the extended model is given by equations  
 170 (15). Unlike previous analyzes which focused on how susceptible individuals change  
 171 their behavior related to the use and acceptance of public health protective and preven-  
 172 tive control measures [2, 3, 41, 43, 54], we also consider change in behavior and decision  
 173 making of the downstream symptomatically infected population. The state variables  
 174 and parameters associated with the behavioral model are summarized in Table 2.

### 175 2.2.1 Susceptible support for closure

176 We begin by analyzing the effect of the susceptible individuals support or opposition of  
 177 school and workplace closures. To isolate the effect of susceptible individual behavior,  
 178 we assume that  $\kappa_I = 0$  and  $x_I(0) = 0$ , that is, the symptomatically infected individual  
 179 behavior is suppressed. Our modeling approach to the susceptible individual behavior  
 180 is derived from [41], and is described in section 4.2.1. Susceptible individuals seek to  
 181 avoid getting infected, and they weigh perceived risk of infection versus the possible

182 socio-economic losses due to the partial economy shutdown; the socio-economic losses  
 183 accumulate over time. We assumed that the decision to enact appropriate closures  
 184 stays in effect if and only if a certain minimum time has passed since the start of the  
 185 pandemic and at least half of the susceptible population supports closures.

186 In all simulations involving susceptible individual support for closure, we assume  
 187 that the effectiveness of closures is  $C_0 = 0.6$  and the initial time the closure decision  
 188 may be enacted is  $t_{\text{close}} = 30$  days. Figure 5(a) shows the effect of dynamically chang-  
 189 ing susceptible individual behavior on the progression of the epidemic with different  
 190 starting conditions, which capture the initial predisposition of the population towards  
 191 such drastic measures as school and workplace closures.

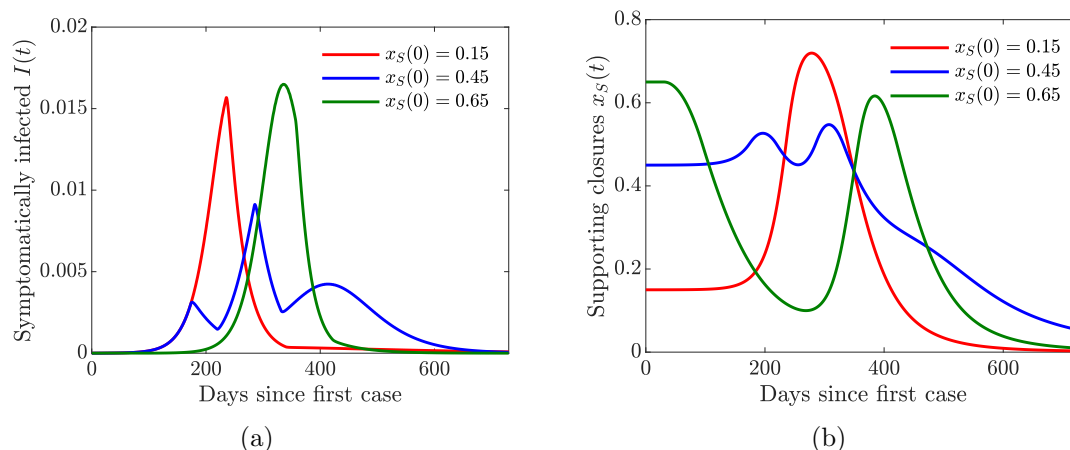

Figure 5: Simulations of the COVID-19 model with dynamic human behavior (15) with various initial proportions  $x_S(0)$  of the susceptibles in support of lock-down. The social learning rate of susceptible individuals is  $\kappa_S = 1$ . (a) The progression of the proportion of symptomatically infected individuals  $I(t)$ . (b) The progression of the proportion of the susceptible population in support of the closure or lock-down measures. The measures are enacted as long as  $t \geq t_{\text{close}}$  and  $x_S(t) \geq 0.5$ .

192 When the population is initially skeptical about the closures ( $x_S(0) = 0.15$ ), then it  
 193 takes a while to build sufficient support for the measure to be enacted (Figure 5(b), red  
 194 line). As a result, the closures take place too late, and the pandemic reaches its peak  
 195 early on (Figure 5(a), red line). On the other hand, when the population is initially  
 196 overenthusiastic about the closures ( $x_S(0) = 0.65$ ), the measure is enacted too early  
 197 (Figure 5(b), green line). However, the accumulating socio-economic losses due to the  
 198 lock-down start to wear people down, and the majority of the population begins to  
 199 oppose the lock-down. This results in a sharp peak of the cases (Figure 5(a), green  
 200 line), which is simply delayed in time. The rise in the prevalence of infection forces  
 201 individuals to revert to the lock-down measures, but this switch in behavior comes too  
 202 late to prevent a spike in infections.

203 The lowest infection peaks are achieved when the proportion of susceptible indi-  
 204 viduals initially supporting the closures is neither too low or too high but “just right”  
 205 ( $x_S(0) = 0.45$ ). The lock-down is enacted as soon as the number of cases begins  
 206 to increase (Figures 5(a) and 5(b), blue lines). The initial epidemic is stifled, and  
 207 the closure support drops below the threshold, which results in (partial) re-openings.  
 208 However, the number of infected individuals is still relatively high, and a second bigger



209 wave of infections occurs. The second wave forces another shutdown, which persists  
210 for a shorter period of time compared to the first one. This scenario is similar to what  
211 has been happening in the US, and it shows that a second wave of COVID-19 may  
212 result from rational human behavior due to the burden of accumulating socio-economic  
213 losses. This observation matches the results in [41], and it shows that our extended  
214 model with quarantine and hospitalization still captures the basic features of a simpler  
215 model.

216 For simplicity, we used only one value of the susceptible individual social learning  
217 rate parameter ( $\kappa_S = 1$ ) here. We investigate the effects of varying this parameter  
218 when we analyze a coupled model of susceptible and infected individual behavior. In  
219 particular, faster social learning rates may result in multiple waves of infection.

## 220 2.2.2 Symptomatically infected self-isolation

221 We now analyze the effect of voluntary decisions to self-isolate by symptomatically in-  
222 fected individuals. We assume that  $\kappa_S = 0$  and  $x_S(0) = 0$  so that susceptible individual  
223 support for closure behavior is suppressed. Our modeling approach to symptomatically  
224 infected individual behavior is described in Section 4.2.2. Unlike susceptible individu-  
225 als, who seek to protect themselves from the infection, infected individuals cannot pro-  
226 tect themselves—they are already infected. However, conscientious individuals may  
227 wish to protect the rest of the population from getting infected; these individuals  
228 weigh the perceived burden of infecting others versus the inconvenience and cost of  
229 self-isolation.

230 Figure 6(a) shows the impact of dynamically changing infected individual behavior  
231 to self-isolate or not self-isolate on the progression of the epidemic. At the onset of the  
232 epidemic, when the number of cases and fatalities is relatively small, infected individ-  
233 uals would tend not to engage in voluntary self-isolation (Figure 6(b)). As the number  
234 of infections—and hence disease-induced deaths—grows, the burden on the susceptible  
235 population becomes larger, and the infected individuals are more willing to self-isolate  
236 to protect others. The initial predisposition of the population to the altruistic act of  
237 self-isolation determines the peak of the epidemic and its timing (Figure 6(a)). The  
238 more individuals are willing to self-isolate, the lower the peak and the later it occurs.

239 We considered one set of fixed values of the symptomatically infected individual  
240 social learning rate parameter  $\kappa_I$  and the sensitivity to self-isolation parameter  $\varepsilon_I$ .  
241 We investigate the effects of varying these parameters in a full behavioral model. In  
242 particular, lowering the sensitivity to self-isolation results in bigger and more sustained  
243 support of self-isolation.

## 244 2.2.3 Human behavior coupled with quarantine and hospitalization

245 In this section, we consider the full behavioral model, where both susceptible and symp-  
246 tomatically infected individuals adjust their behavior in response to the epidemic. We  
247 initialize the model simulations with only 15% of the susceptible population supporting  
248 closure and 15% of the symptomatic population willing to self-isolate, which correspond  
249 to the worst-case scenarios considered in Figures 5 and Figure 6.

250 Figure 7 shows the results of the simulation with varying quarantine ( $\omega_Q$ ), hos-  
251 pitalization ( $\omega_H$ ), quarantine violation ( $\nu_Q$ ), and hospital discharge ( $\nu_H$ ) rates. The

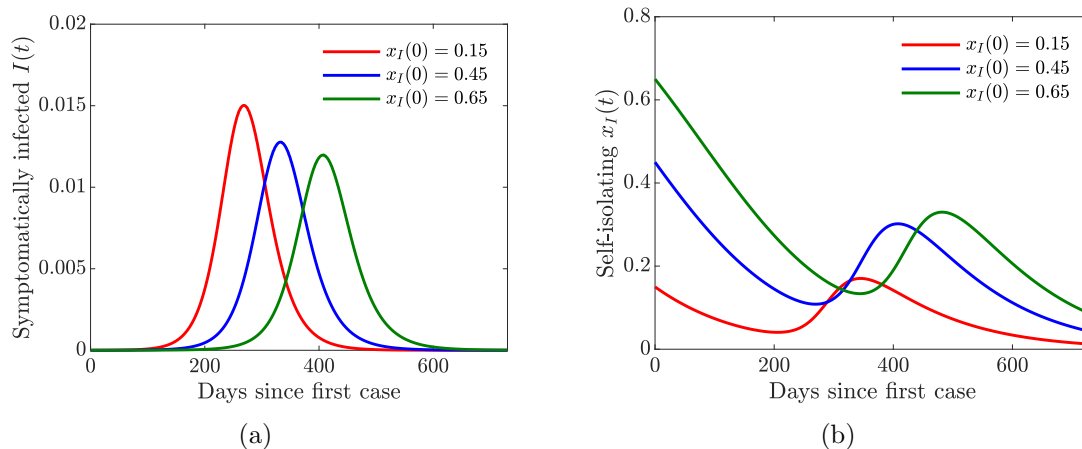

Figure 6: Simulations of the COVID-19 model with dynamic human behavior (15) with various initial proportions  $x_I(0)$  of symptomatically infected individuals willing to self-isolate. The social learning rate of infected individuals is  $\kappa_I = 100$ , and the sensitivity to self-isolation is  $\varepsilon_I = 0.00008$ . (a) The progression of the proportion of symptomatically infected individuals  $I(t)$ . (b) The progression of the proportion of symptomatically infected population willing to self-isolate.

252 peak of the epidemic is lower and shifted to the right in time with higher quaran-  
 253 tine and hospitalization rates (Figure 7(a)), while an opposite effect is achieved with  
 254 higher quarantine violation and hospital discharge rates (Figure 7(c)). The population  
 255 behavioral response is informed by the severity of the epidemic: higher prevalence of  
 256 the disease results in larger proportions of individuals supporting closure or willing to  
 257 self-isolate (Figures 7(b) and 7(d)).

258 Figure 7 illustrates the importance of discouraging disease-magnifying behavior  
 259 such as violating and breaking quarantine laws. Moreover, lower sensitivity to self-  
 260 isolation ( $\varepsilon_I = 0.00001$  in Figure 7 compared to  $\varepsilon_I = 0.00008$  in Figure 15) allows  
 261 the self-isolating behavior to persist for a longer period of time (compare Figure 7(b)  
 262 with 15(b) and Figure 7(d) with 15(d)) thus effectively reducing the burden of the  
 263 infection on the susceptible part of the population (compare Figure 7(a) with 15(a)  
 264 and Figure 7(c) with 15(c)). It is therefore important to encourage and incentivize  
 265 such exemplary behavior by infected individuals.

## 266 2.3 Multiple waves of infections

267 In this section, we demonstrate the possibility of multiple waves of infection as a  
 268 consequence of modifying the rates of behavioral response to the emerging epidemic  
 269 conditions. The rates of behavioral response are controlled by the social learning  
 270 rate parameters  $\kappa_S$  and  $\kappa_I$  for susceptible and symptomatically infected individuals,  
 271 respectively, in the imitation dynamics model. Higher values of these parameters mean  
 272 individuals imitate the behavior of other individuals, who are more successful according  
 273 to the dynamic game payoffs, more eagerly. This effects quicker response to the evolving  
 274 conditions, which may result in multiple oscillations of both the behavioral response  
 275 and infections curves.

276 In general, we assumed that  $\kappa_S < \kappa_I$  because supporting school and workplace

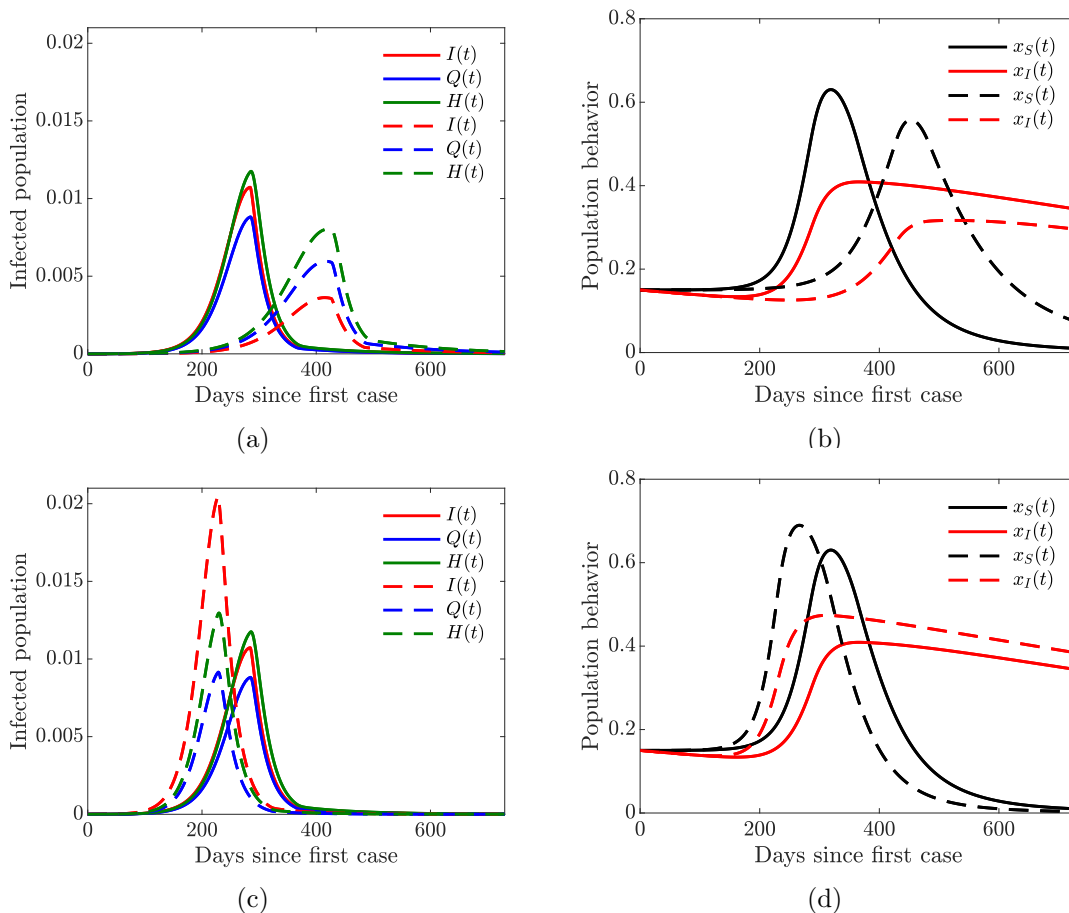

Figure 7: Simulations of the COVID-19 model with dynamic human behavior (15) for the proportions of all symptomatic infections and behavioral response with low sensitivity to self-isolation  $\varepsilon_I = 0.00001$ . The social learning rates are  $\kappa_S = 1$  and  $\kappa_I = 100$ , and  $x_S(0) = x_I(0) = 0.15$ . Solid lines correspond to the values of the baseline model parameters given in Table 3. (a)–(b) Dashed lines correspond to double quarantine ( $\omega_Q$ ) and hospitalization ( $\omega_H$ ) rates (c)–(d) Dashed lines correspond to double quarantine violation ( $\nu_Q$ ) and hospital discharge ( $\nu_H$ ) rates.

277 closures usually carries bigger concessions than self-isolation. For example, individuals  
 278 who can continue working remotely are more likely to support such measures, while  
 279 individuals who will lose their jobs while part of the economy is shut down are less likely  
 280 to support measures that may result in loss or reduction of their income. Therefore,  
 281 susceptible individuals may have different sensitivity to the socio-economic losses, and  
 282 that is why we assumed that the social learning rate  $\kappa_S$  for closure support behavior  
 283 is lower than that for self-isolating behavior ( $\kappa_I$ ).

284 Figure 8 shows that increasing the support closure behavior social learning rate  
 285  $\kappa_S$  produces oscillations in the behavioral response and hence in the prevalence of the  
 286 disease. For higher values ( $\kappa_S = 30$ , see Figure 8(c)), we observe two waves of infections  
 287 of similar magnitude. On the other hand, simultaneous increase in the self-isolation  
 288 behavior social learning rate ( $\kappa_I = 650$ ) coupled with low sensitivity to self-isolation  
 289 ( $\varepsilon_I = 0.00001$ ) allows the population to overcome a second large wave of the pandemic

290  
291  
292  
293

by responding quickly and decidedly to the first big wave (see dashed lines in all panes of Figure 8). Still, increasing the self-isolation social learning rate parameter does not prevent a second large wave of the pandemic if the population sensitivity to self-isolation is higher ( $\varepsilon_I = 0.00008$ ), see Figure 16.

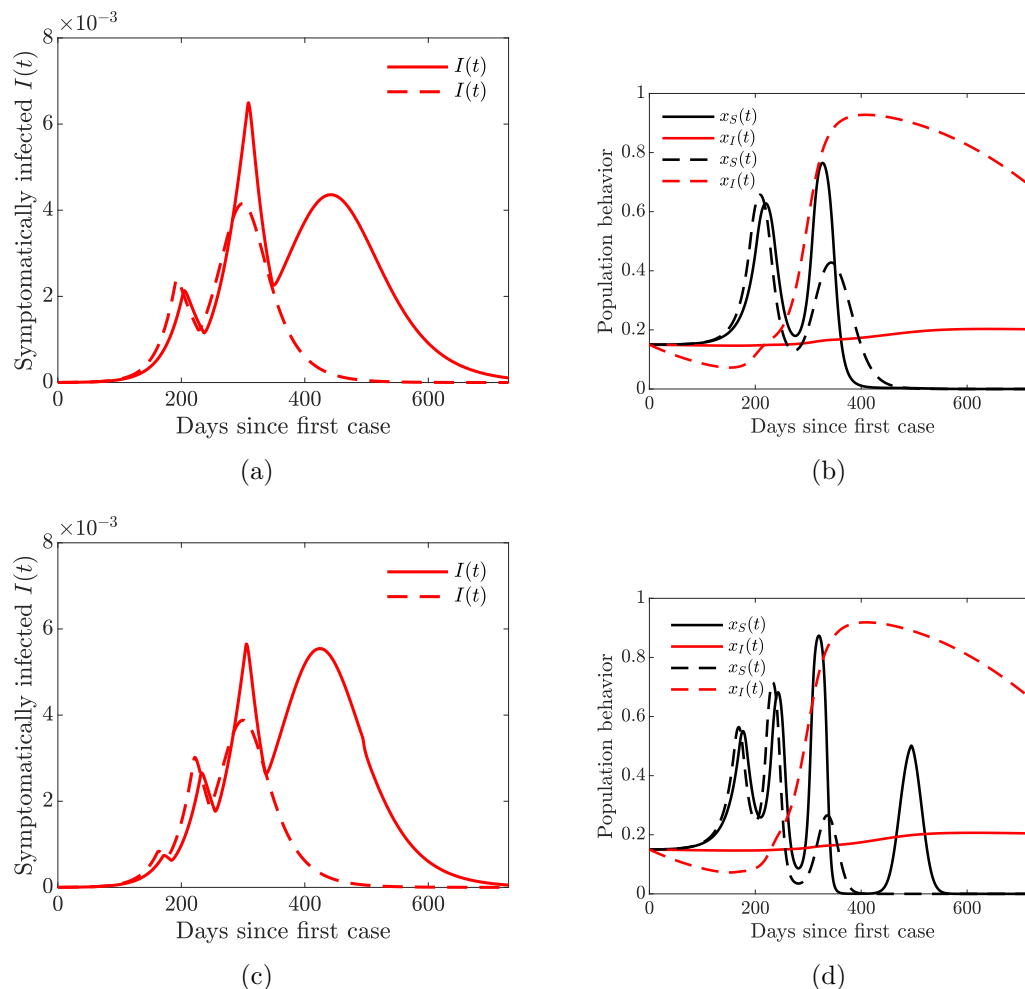

Figure 8: Simulations of the COVID-19 model with dynamic human behavior (15) showing multiple waves of epidemic while varying susceptible ( $\kappa_S$ ) and symptomatic ( $\kappa_I$ ) individual social learning rates with low sensitivity to self-isolation  $\varepsilon_I = 0.00001$ . Solid lines correspond to  $\kappa_I = 20$ , dashed lines correspond to  $\kappa_I = 650$ . (a) Proportion of symptomatic infections  $I(t)$  with one big and two smaller waves (solid lines),  $\kappa_S = 10$ . (b) Proportion of susceptible ( $x_S$ ) and symptomatic ( $x_I$ ) individuals adopting positive behavior,  $\kappa_S = 10$ . (c) Proportion of symptomatic infections  $I(t)$  with two big and one small wave (solid lines),  $\kappa_S = 30$ . (d) Proportion of susceptible ( $x_S$ ) and symptomatic ( $x_I$ ) individuals adopting positive behavior,  $\kappa_S = 30$ .

294  
295  
296  
297  
298

Multiple waves of infection of similar magnitude may occur if the closure support social learning rate is low ( $\kappa_S = 5$ ) while the self-isolation social learning rate is high ( $\kappa_I = 1350$ ) and sensitivity to self-isolation is low ( $\varepsilon_I = 0.00001$ ); see Figure 9. This may seem counter-intuitive because higher willingness to self-isolate should ideally result in quick suppression of a spike in disease. At the same time, with high sensitivity

299 to the epidemiological situation, individuals switch back to non-compliance as soon as  
 300 the situation improves but well before the disease prevalence is reduced to negligible  
 301 numbers. This, in turn, results in a new spike of infections. We note that this phe-  
 302 nomenon is amplified by the presence of quarantine violation in our model because  
 303 quarantine violation often results in outbreaks [4]. When the quarantine violation rate  
 304  $\nu_Q$  is set to zero, we no longer observe multiple epidemic waves of such magnitude.

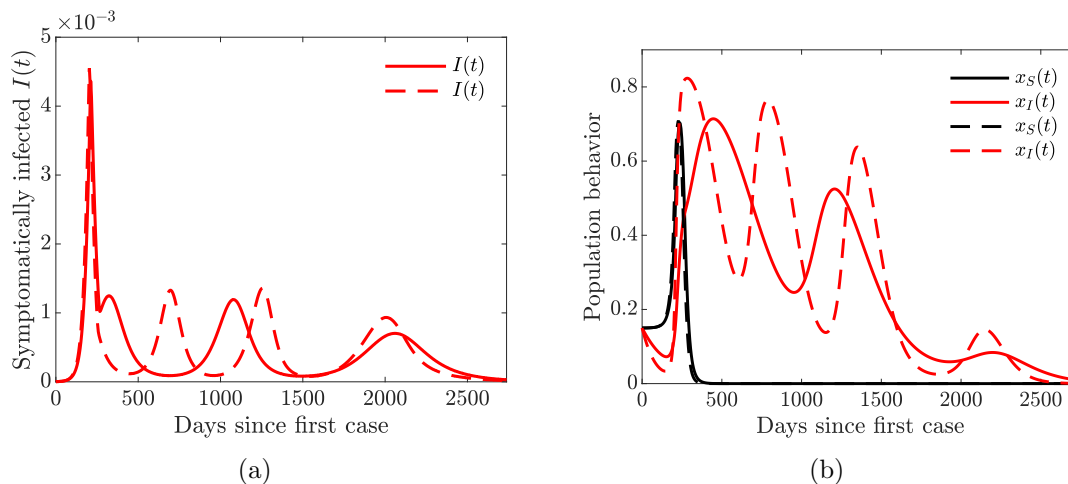

Figure 9: Simulations of the COVID-19 model with dynamic human behavior (15) showing epidemic oscillations with high self-isolation social learning rate. Solid lines correspond to  $\kappa_I = 650$ , dashed lines correspond to  $\kappa_I = 1350$ ; fixed values  $\kappa_S = 5$  and  $\varepsilon_I = 0.00001$ . (a) Oscillating proportion of symptomatic infections  $I(t)$ . (b) Proportion of susceptible ( $x_S$ ) and symptomatic ( $x_I$ ) individuals adopting positive behavior.

305 Figures 8 and 9 show the possibility of multiple epidemic waves or an epidemic  
 306 with several oscillations. We have seen that the persistence of these waves is due to  
 307 the high rate of social learning behavior of the susceptible or symptomatically infected  
 308 individuals in the community or the violation of the quarantine rules. We will now  
 309 explore in more detail the impact of increased quarantine and quarantine violation  
 310 rates on the multiple epidemic waves. We will couple this with varying hospitalization  
 311 and hospital discharge rates.

312 Figure 10 shows that increasing the quarantine and hospitalization rates prevents  
 313 future waves of infection. This is achieved by dampening multiple oscillations in the  
 314 behavior of symptomatically infected individuals and prolonged support for lock-down  
 315 measures.

316 Lastly, we investigate the impact of increased quarantine violation and hospital  
 317 discharge rates on multiple waves of infection. We see from Figure 11 that increasing  
 318 quarantine violation and hospital discharge rates produces multiple epidemic peaks of  
 319 larger magnitude. Higher initial prevalence of the disease (Figure 11(a) dashed line)  
 320 causes multiple oscillations in self-isolating behavior (Figure 11(b)) and hence future  
 321 waves of infection.

322 The take home-message from the results presented in Figures 10 and 11 is that  
 323 increased hospitalization and quarantine rates can help diminish future infection waves  
 324 and could even lead to the disappearance of a second large wave. However, frequent

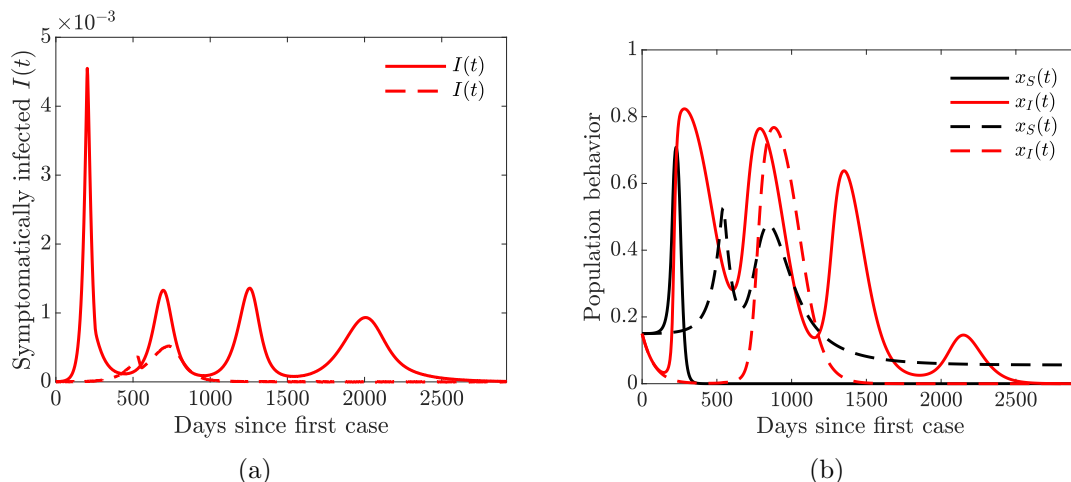

Figure 10: Simulations of the COVID-19 model with dynamic human behavior (15) showing the damping effect of increased quarantine ( $\omega_Q$ ) and hospitalization ( $\omega_H$ ) rates. Solid lines correspond to base values of  $\omega_Q$  and  $\omega_H$ , dashed lines correspond to a 5-fold increase in these values; fixed values  $\kappa_S = 5$ ,  $\kappa_I = 1350$ , and  $\varepsilon_I = 0.00001$ . (a) Proportion of symptomatic infections  $I(t)$ . (b) Proportion of susceptible ( $x_S$ ) and symptomatic ( $x_I$ ) individuals adopting positive behavior.

325 quarantine violation and early hospital discharge of those still infectious may lead to  
 326 persistent prevalence of the disease with regular spikes in the number of cases.

327 In summary, the simulations of the COVID-19 model with dynamic human behavior  
 328 (15) show that:

- 329 (i) Symptomatic individuals learning and mimicking self-isolating behavior reduces  
 330 the disease burden in the population but can lead to multiple epidemic waves if  
 331 fewer susceptible individuals mimic and learn closure support behavior.
- 332 (ii) Quarantine violation and hospital discharge of symptomatic individuals amplifies  
 333 the peaks of the infection waves and can lead to infection waves that persist in  
 334 the community.
- 335 (iii) Increasing quarantine and hospitalization rates can prevent multiple waves of  
 336 infection.
- 337 (iv) It is important to incentivize the cost and burden of self-isolation to encour-  
 338 age more symptomatic individuals to self-isolate because high sensitivity to self-  
 339 isolation is not beneficial to the community as a whole.

### 340 3 Discussion and Conclusions

#### 341 3.1 Discussion

342 We constructed a novel compartmental model of COVID-19 transmission, which in-  
 343 cludes compartments for quarantined and hospitalized individuals; see Figure 1 and  
 344 equations (1). We coupled this model with a game-theoretic model of dynamically  
 345 changing human behavior in equations (15). The susceptible individuals choose to ei-  
 346 ther support school and workplace closures or not, and their strategic choices are driven

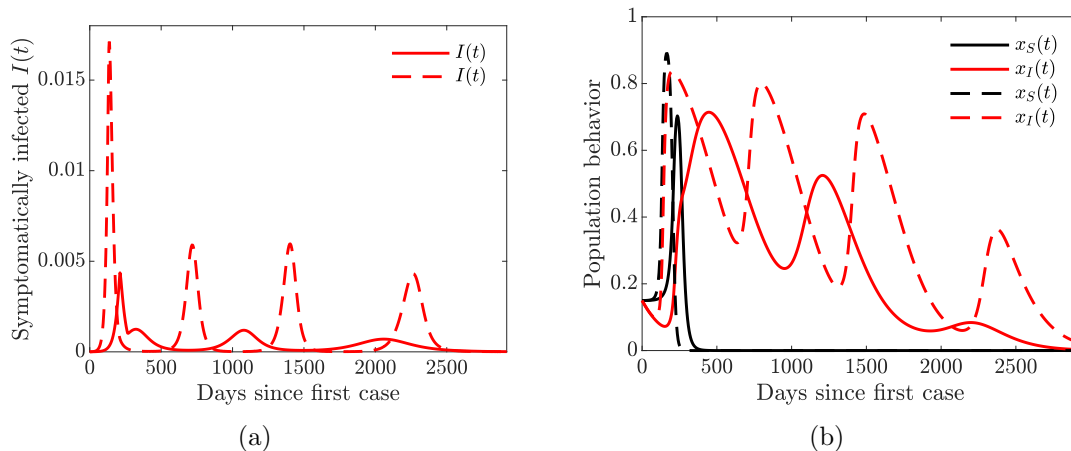

Figure 11: Simulations of the COVID-19 model with dynamic human behavior (15) showing the devastating effect of increased quarantine violation ( $\nu_Q$ ) and hospital discharge ( $\nu_H$ ) rates. Solid lines correspond to base values of  $\nu_Q$  and  $\nu_H$ , dashed lines correspond to an 8-fold increase in these values; fixed values  $\kappa_S = 5$ ,  $\kappa_I = 650$ , and  $\varepsilon_I = 0.00001$ . (a) Proportion of symptomatic infections  $I(t)$ . (b) Proportion of susceptible ( $x_S$ ) and symptomatic ( $x_I$ ) individuals adopting positive behavior.

347  
348  
349  
350  
351  
352  
353  
354  
355  
356  
357  
358  
359  
360  
361  
362  
363  
364  
365  
366  
367  
368  
369  
370  
371  
372

by the perceived risk of getting infected versus the sensitivity of possible socio-economic losses due to the (partial) lock-down. The symptomatically infected individuals consider protecting the rest of the population by self-isolating from society; they base their decisions on the perceived burden of the disease versus the burden of social isolation.

We also investigated the effects of quarantine violation due to social non-compliance and early hospital discharge due to shortage of resources. Increasing the rates of quarantine violation and hospital discharge results in a higher peak of the pandemic, which occurs earlier (Figure 4) and hence could be more devastating. At the height of the outbreak in Michigan and New York, hospitals were discharging early the not-too-critically ill either to nursing homes or simply letting them go home because hospital facilities were overwhelmed [36, 45]. This prompted legislation in Michigan to protect the seniors and vulnerable members of the community and prevent nursing homes from admitting patients with COVID-19 [37]. In other places like Arizona, some nursing homes are actually taking COVID-19 patients with mild symptoms [20].

To reduce the disease burden in the community, it is important to keep the infection rate  $\beta$  low (approximately 0.22). This can be achieved by maintaining proper hygiene (frequently washing hands for 20 seconds), social distancing, and wearing facial masks. Unfortunately, the use of facial masks has become a polarizing topic in the United States, resulting in shaming, and violence [6, 33, 35, 46]. Nevertheless, the science behind the use of facial masks shows that the use of surgical masks prevent the dispersal and transmission of COVID-19 droplets and aerosols [8, 18, 34], and hence using facial masks is one of the critical measures in combating the pandemic.

Figures 5 and 6, which demonstrate the effect of dynamic behavior by susceptible and symptomatically infected individuals respectively, show that preventing the symptomatic infectious from spreading the disease is as important as preventing the susceptible population from getting the infection. When the behavior of susceptible

373 and symptomatically infected individuals was analyzed separately from each other, it  
374 turned out that the peak of the epidemic curve generated by symptomatic infections  
375 willing to self-isolate was lower than the peak of the epidemic curve generated by the  
376 susceptibles who are in support of the lock-down or closure measures. Thus, it is essen-  
377 tial to prevent people from violating quarantine and social isolation rules especially as  
378 young people have been throwing “coronavirus parties” [49]. These parties are hosted  
379 either to defy social distancing rules or to get infected in hope to possibly build up  
380 immunity against the virus or simply because some people still think the virus is a  
381 hoax [39, 49].

382 One of our key findings is the possibility of multiple waves of infections due to  
383 rational human behavior. We saw in Figure 9 that these waves can persist when  
384 the rate of social learning of infected individuals is too high and their sensitivity to  
385 self-isolation is low. In this case, the infected individuals switch their behavior from  
386 self-isolating to not self-isolating while the prevalence of the infection is still relatively  
387 high; this results in a next wave of infections. The population quickly recognizes this  
388 shift in the state of the pandemic, and starts to self-isolate more often, thus suppressing  
389 this wave and repeating the cycle several times. On the other hand, the effect of such  
390 sensitive behavior can be mitigated by increasing quarantine and hospitalization rates  
391 (Figure 10).

392 Our key findings further show that when the symptomatic infectious population  
393 learn the positive behavior or are more willing to self-isolate, the community benefits,  
394 even though this change in behavior comes at a cost to them. Self-isolation often comes  
395 with financial implications and distress; not very many people can bear these burdens.  
396 Hence, it is important to incentivize self-isolation of the symptomatic infectious pop-  
397 ulation as many infected people will rather stay home than go to work since staying  
398 at home will help the public good and create an opportunity to help save more lives  
399 [26]. One way to incentivize the symptomatic infectious is to pay them to stay home,  
400 perhaps via direct government subsidies for sick leave for infected individuals [26]. Our  
401 result shows that infection in the community will reduce particularly if the associated  
402 cost of self-isolation is cheap. If this cost is high and people keep violating quarantine  
403 rules, the infection could run away and become a persistent recurrent infection in the  
404 community, as shown in Figures 9–11.

405 We assumed that sensitivity to societal isolation measures was constant. However,  
406 public perception of these measures as necessary for the common good may change with  
407 time. For example, it may become a social norm to self-isolate in the face of a pandemic,  
408 and in this case infected individuals are more willing to isolate themselves from the  
409 rest of the population. A future iteration of this model should consider the effect of  
410 evolving public perception of the social stigma for those who refuse to self-isolate. We  
411 also considered the quarantine violation as a static feature of the model. However,  
412 the quarantine violation behavior may evolve with time just as self-isolating behavior.  
413 Constructing a dynamic game model of evolving quarantine violation behavior could  
414 involve an adaptive dynamic approach.

415 Additional concerns should be given to the ability to self-isolate. Proscriptive guide-  
416 lines and current policies often fail to recognize that certain populations are less able or  
417 willing to stay at home due to compromised living situations, financial limitations, or  
418 precarious economic opportunities. Further approaches should consider how individual  
419 behaviors vary across key socioeconomic and demographic population characteristics.



## 3.2 Conclusions

The goal of this study was to provide insight into possible effects of human behavior on non-pharmaceutical intervention strategies (such as partial lock-down and social isolation) aimed at containing the spread of COVID-19. Standard epidemiological models neglect human behavior, yet it is a major factor for studying COVID-19 transmission while there are no known pharmaceutical solutions. We showed that in certain circumstances rational human behavior may result in multiple waves of the pandemic, which persist for a long period of time.

Finally, we summarize our results according to whether human behavior is static or dynamic driven by public perception of risk of the infection and sensitivity to isolation measures.

- (a) The simulations of the COVID-19 model (1) with static human behavior (constant quarantine violation rate) show that:
  - (i) Increased quarantine violation and discharge rates of those still infectious due to overwhelmed hospital resources results in greater disease burden leading to an early epidemic peak.
  - (ii) Increasing quarantine and hospitalization rates reduces the disease burden and the epidemic peak.
- (b) The simulations of the COVID-19 model (15) with dynamic human behavior show that:
  - (i) Symptomatic individuals learning and mimicking positive behavior reduces the disease burden in the population but can lead to multiple epidemic waves if fewer susceptible individuals mimic and learn positive behavior.
  - (ii) Quarantine violation and hospital discharge of symptomatic individuals amplifies the peaks of the infection waves and can lead to infection waves that persist in the community.
  - (iii) Increasing quarantine and hospitalization rates can prevent multiple waves of infection.
  - (iv) It is important to incentivize the burden of self-isolation to encourage more symptomatic infectious to self-isolate because high cost of self-isolation is not beneficial to the infectious nor to the community as a whole.

Overall, our results emphasize the importance of diverse steps that could be implemented that would incentivize and support responsible behavior by individuals. This might involve positive reinforcement, such as subsidies and economic support, or negative consequences, such as penalties and fines for those not obeying and following appropriate behavioral norms.

## 4 Methods

In this study, we develop a novel COVID-19 transmission model that incorporates dynamic human behavior, which is driven by various factors. We parameterized the model using data from the ongoing COVID-19 outbreaks. To develop this novel game-theoretic model with dynamic human behavior, we first consider a baseline epidemiological model with static human behavior.

## 4.1 Baseline COVID-19 model

We construct a model of COVID-19 transmission with quarantine and hospitalization. We follow the natural history of the infection [42, 53] and partition the population according to their disease status as susceptible ( $S(t)$ ), exposed ( $E(t)$ ), asymptotically infected ( $A(t)$ ), symptomatically infected ( $I(t)$ ), quarantined ( $Q(t)$ ), hospitalized ( $H(t)$ ), and removed ( $R(t)$ ) individuals. The static human behavior in this model is represented by the constant rate of violating quarantine.

We assume that the population is not affected by birth and natural mortality because we are modeling short-term dynamics of the pandemic. We therefore treat compartment sizes as proportions of the entire population. Susceptible individuals become exposed upon contact with infected individuals, and the force of infection is given by

$$\lambda(t) = \beta[I(t) + \eta_A A(t) + \eta_Q Q(t) + \eta_H H(t)],$$

where  $\beta$  is the infection rate, and  $\eta_A$ ,  $\eta_Q$ , and  $\eta_H$  are the modification parameters representing reduced infectiousness of asymptomatic, quarantined, and hospitalized individuals respectively.

Exposed individuals become infected at the rate  $\sigma$ . A proportion  $q$  of these individuals show no symptoms of the disease and move to the asymptotically infected compartment, while a proportion  $(1 - q)$  of exposed individuals develop clinical symptoms of the disease and move to the symptomatically infected compartment. Asymptomatic (symptomatic) individuals recover from the disease at the rate  $\gamma_A$  ( $\gamma_I$ ) and die at the rate  $\delta_A$  ( $\delta_I$ ). Symptomatic individuals are hospitalized at the rate  $\omega_H$ . Those individuals whose condition is not sufficiently severe are quarantined at the rate  $\omega_Q$ . There have been reports of people flouting quarantine [15, 19, 25, 38], and we assume that quarantined individuals break the quarantine at the rate  $\nu_Q$ . Quarantined individuals recover from the disease at the rate  $\gamma_Q$  and die at the rate  $\delta_Q$ .

COVID-19 spreads at an alarming rate, requiring high rates of hospitalization. Hospitals often become overwhelmed and may run out of beds, respirators, ventilators, and ICUs [47]. Furthermore, some hospitals are reserving beds for the critically ill COVID-19 patients and discharging those with less severe illness [1, 27]. We assume that due to the limitations in hospital capacity, hospitalized individuals leave the hospitals while still infected at the rate  $\nu_H$ . Hospitalized individuals recover from the disease at the rate  $\gamma_H$  and die at the rate  $\delta_H$ .

The removed individuals comprise both recovered and deceased individuals. We disregard the possibility of reinfection because we are looking into short-term dynamics of the disease spread in the population. We therefore assume that recovered individuals do not contribute to the spread of the infection.

The flow diagram depicting the transitions between compartments as the disease progresses through the population is shown in Figure 1, and the associated state variables and parameters are described in Table 1.

The differential equations describing the dynamics of this model are given in Equation (1).

$$\begin{aligned}
 \frac{dS}{dt} &= -\beta[I(t) + \eta_A A(t) + \eta_Q Q(t) + \eta_H H(t)]S(t) \\
 \frac{dE}{dt} &= \beta[I(t) + \eta_A A(t) + \eta_Q Q(t) + \eta_H H(t)]S(t) - \sigma E(t) \\
 \frac{dA}{dt} &= q\sigma E(t) - (\gamma_A + \delta_A)A(t) \\
 \frac{dI}{dt} &= (1 - q)\sigma E(t) + \nu_Q Q(t) + \nu_H H(t) - (\omega_Q + \omega_H + \gamma_I + \delta_I)I(t) \\
 \frac{dQ}{dt} &= \omega_Q I(t) - (\nu_Q + \gamma_Q + \delta_Q)Q(t) \\
 \frac{dH}{dt} &= \omega_H I(t) - (\nu_H + \gamma_H + \delta_H)H(t) \\
 \frac{dR}{dt} &= (\gamma_A + \delta_A)A(t) + (\gamma_I + \delta_I)I(t) + (\gamma_Q + \delta_Q)Q(t) + (\gamma_H + \delta_H)H(t)
 \end{aligned} \tag{1}$$

## 502 4.2 Model of dynamic human behavior

503 In this section, we use the imitation dynamic approach of evolutionary game theory  
 504 [3, 43] to model evolving human behavior in response to the pandemic and its effect  
 505 on the spread of the disease. We consider behavioral response of both susceptible and  
 506 infected individuals. Susceptible individuals wish to protect themselves from getting  
 507 infected, and they consider supporting social distancing measures such as school and  
 508 workplace closures. On the other hand, conscientious infected individuals consider self-  
 509 isolation as means to protect the rest of the population. We begin by modeling each  
 510 type of behavior separately, and then we implement both behavioral responses within  
 511 our baseline COVID-19 model.

### 512 4.2.1 Susceptible individual support for school and workplace closure

513 As the pandemic rages on without any known pharmaceutical drugs or vaccines, using  
 514 personal protection equipment (PPE), washing hands, social distancing, and economic  
 515 lock-downs are the measures recommended to contain and control the disease [12, 30,  
 516 52]. We adopt the approach of [41] to model the behavioral response of the susceptible  
 517 individuals. The susceptible individuals have two strategies to choose from: to support  
 518 closure or not to support closure; we let  $x_S(t)$  denote the proportion of susceptible  
 519 individuals that support closure. The time-varying function  $C(t)$  captures the impact  
 520 of social distancing measures such as school and workplace closure on the transmission  
 521 of COVID-19. The evolution of the susceptible and exposed sub-populations with  
 522 social distancing becomes

$$\begin{aligned}
 \frac{dS}{dt} &= -\beta[1 - C(t)][I(t) + \eta_A A(t) + \eta_Q Q(t) + \eta_H H(t)]S(t) \\
 \frac{dE}{dt} &= \beta[1 - C(t)][I(t) + \eta_A A(t) + \eta_Q Q(t) + \eta_H H(t)]S(t) - \sigma E(t)
 \end{aligned} \tag{2}$$

523 Following [41], we define

$$C(t) = \begin{cases} 0 & \text{if } t < t_{\text{close}} \text{ or } x_S < 1/2 \\ C_0 & \text{if } t \geq t_{\text{close}} \text{ and } x_S \geq 1/2 \end{cases} \tag{3}$$

524 where  $C_0$  is a combined measure of the effectiveness of physical distancing in those  
525 workplaces that remain open and how many workplaces are closed. The decision to  
526 close schools and workplaces is “turned on” if the time after the start of the pandemic  
527 is at least  $t_{\text{close}}$  and at least half of the (susceptible) population supports closure. The  
528 closure policy is “turned off” if less than half of the (susceptible) population supports  
529 closure.

530 The susceptible individuals weigh the risk of the infection based on the disease  
531 prevalence and the accumulating socio-economic losses due to the closures. The sus-  
532 ceptible individuals who do not support school and workplace closure are willing to  
533 face the risk of infection, and their perceived payoff is given by

$$E_0 = -\pi_S[I(t) + Q(t) + H(t)], \quad (4)$$

534 where  $\pi_S$  is the sensitivity to being infected with COVID-19 parameter. The susceptible  
535 individuals who support closure efforts face socio-economic losses, and their perceived  
536 payoff is given by

$$E_1 = -\rho_S L_S(t), \quad (5)$$

537 where  $\rho_S$  is the the sensitivity to the accumulated socio-economic losses  $L_S(t)$ , as in  
538 [41].

539 We now describe how the behavioral responses of susceptible individuals evolve with  
540 time. An individual who did not support closure but decided to switch its strategy  
541 achieves a payoff gain

$$\Delta E_S = E_1 - E_0 = \pi_S[I(t) + Q(t) + H(t)] - \rho_S L_S(t). \quad (6)$$

542 We assume that individuals employ a social learning process where they adopt strate-  
543 gies of other individuals with the rate proportional to the payoff gain, which can be  
544 realized via an imitation dynamic. The proportion of susceptible individuals who sup-  
545 port closure thus evolves according to

$$\frac{dx_S}{dt} = \kappa_S x_S (1 - x_S) \Delta E_S, \quad (7)$$

546 where  $\kappa_S$  is the social learning rate. The individuals who do not support closure ( $1 - x_S$ )  
547 sample the individuals who do support closure ( $x_S$ ) and switch their strategy at the  
548 rate proportional to the payoff gain  $\Delta E_S$ . Using equation (6), we obtain

$$\frac{dx_S}{dt} = \kappa_S x_S (1 - x_S) \{ \pi_S [I(t) + Q(t) + H(t)] - \rho_S L_S(t) \}. \quad (8)$$

549 Individuals are thus more likely to support closure if the prevalence of the infection is  
550 high and/or socio-economic losses due to the closures are low. On the other hand, due  
551 to the accumulating nature of the socio-economic losses, individuals are not likely to  
552 support closure for too long.

553 Since scaling payoff functions does not affect the outcome, we can replace  $\Delta E_S$   
554 given by (6) with  $\Delta E_S = I(t) + Q(t) + H(t) - (\rho_S/\pi_S)L_S(t)$ . Then

$$\frac{dx_S}{dt} = \kappa_S x_S (1 - x_S) [I(t) + Q(t) + H(t) - \varepsilon_S L_S(t)], \quad (9)$$

555 where  $\varepsilon_S = \rho_S/\pi_S$  is the sensitivity to the socio-economic losses relative to getting  
556 infected with COVID-19.

557 Finally, following [41], the evolution of the time-varying quantity  $L_S(t)$ , which  
558 represents the accumulated socio-economic losses, obeys the exponential fading memory  
559 mechanism given by

$$\frac{dL_S}{dt} = \alpha_S C(t) - \xi_S L_S(t), \quad (10)$$

560 where  $\alpha_S$  controls the rate at which school and workplace closures impacts socio-  
561 economic health of the population, and  $\xi_S$  is a decay rate that represents adjustment  
562 to the baseline losses.

### 563 4.2.2 Infected individual self-isolation

564 While susceptible individuals seek to avoid getting infected, the symptomatically in-  
565 fected individuals cannot help themselves. We thus assume that conscientious symp-  
566 tomatically infected individuals seek to minimize the potential damage to the suscep-  
567 tible part of the population.

568 Since COVID-19 was elevated to pandemic status, self-isolation and quarantine had  
569 been the prescribed non-pharmaceutical measures aimed at flattening the incidence  
570 curve. China (at the peak of infection) instituted mandatory quarantine of individuals  
571 and some parts of the country [24, 32]. Other countries imposed travel bans and recom-  
572 mended 14-day quarantines (via self-isolation) for their citizens who travel to hotspot  
573 places [40, 50, 51]. However, people break and violate self-isolation and quarantine  
574 [19, 38] either due to quarantine fatigue or to other factors such as procuring material  
575 needs or limited opportunities to maintain isolation [7, 17]. Some have engaged in even  
576 more deadly behaviors ignoring policies and attending large social gatherings [21, 49].

577 We assume that the symptomatically infected individuals who tested positive for  
578 COVID-19 and were ordered to quarantine themselves leave quarantine at a constant  
579 rate  $\nu_Q$ . However, symptomatically infected individuals ( $I(t)$ ) whose condition was not  
580 severe enough to go to a hospital and/or get tested may elect to self-isolate to protect  
581 others. Let  $x_I(t)$  be the proportion of symptomatically infected individuals  $I(t)$  who  
582 elect to self-isolate. We assume that self-isolated individuals do not contribute to  
583 the spread of the infection, and the force of infection term involving  $I(t)$  becomes  
584  $(1 - x_I(t))I(t)$ . Hence, the equations for the susceptible and exposed individuals from  
585 the baseline model become

$$\begin{aligned} \frac{dS}{dt} &= -\beta\{[1 - x_I(t)]I(t) + \eta_A A(t) + \eta_Q Q(t) + \eta_H H(t)\}S(t) \\ \frac{dE}{dt} &= \beta\{[1 - x_I(t)]I(t) + \eta_A A(t) + \eta_Q Q(t) + \eta_H H(t)\}S(t) - \sigma E(t) \end{aligned} \quad (11)$$

586 A symptomatically infected individual who elects not to self-isolate faces the burden  
587 of infecting other individuals. These individuals use the publicly available information  
588 on the COVID-19-induced death rates to estimate the extent of the burden. We  
589 therefore assume that the payoff of an individual who chooses not to self-isolate is  
590 given by

$$E_0 = -\pi_I[\delta_I I(t) + \delta_Q Q(t) + \delta_H H(t)], \quad (12)$$

591 where  $\pi_I$  is the sensitivity to infecting others parameter. On the other hand, an infected  
592 individual who decides to self-isolate faces a fixed cost of such a decision because the

593 length of self-isolation is approximately equal to the time it takes to recover. Hence,  
 594 the payoff of an individual who chooses to self-isolate is given by

$$E_1 = -\rho_I, \quad (13)$$

595 where  $\rho_I$  is the sensitivity to self-isolation parameter.

596 Similar to the closure support model described above, the proportion of symptomati-  
 597 cally infected individuals who elect to self-isolate evolves according to the imitation  
 598 dynamic

$$\frac{dx_I}{dt} = \kappa_I x_I (1 - x_I) \{ \delta_I I(t) + \delta_Q Q(t) + \delta_H H(t) - \varepsilon_I \}, \quad (14)$$

599 where  $\kappa_I$  is the self-isolation social learning rate, and  $\varepsilon_I = \rho_I / \pi_I$  is the sensitivity  
 600 to self-isolation relative to infecting others. The (conscientious) infected individuals  
 601 would tend to self-isolate if the COVID-19-induced death toll is high, while they would  
 602 tend not to self-isolate as long as the death rates become sufficiently low.

### 603 4.2.3 The COVID-19 model with combined dynamic behavior

604 We now combine the two types of adaptive strategic responses in the population. The  
 605 susceptible individuals elect to either support or not support school and workplace clo-  
 606 sures, while infected individuals elect to self-isolate or not to self-isolate. Combining  
 607 equations (2) and (11) and replacing the corresponding equations in the baseline model  
 608 (1) results in a coupled COVID-19 model with combined behavioral effects where parts  
 609 of the population adjust their behavior after sampling or learning other people's be-  
 610 havior according to the appropriately defined payoffs. This coupled disease-behavior  
 611 system is given by the following system of ordinary differential equations:

$$\begin{aligned} \frac{dS}{dt} &= -\beta[1 - C(t)][(1 - x_I(t))I(t) + \eta_A A(t) + \eta_Q Q(t) + \eta_H H(t)]S(t) \\ \frac{dE}{dt} &= \beta[1 - C(t)][(1 - x_I(t))I(t) + \eta_A A(t) + \eta_Q Q(t) + \eta_H H(t)]S(t) - \sigma E(t) \\ \frac{dA}{dt} &= q\sigma E(t) - (\gamma_A + \delta_A)A(t) \\ \frac{dI}{dt} &= (1 - q)\sigma E(t) + \nu_Q Q(t) + \nu_H H(t) - (\omega_Q + \omega_H + \gamma_I + \delta_I)I(t) \\ \frac{dQ}{dt} &= \omega_Q I(t) - (\nu_Q + \gamma_Q + \delta_Q)Q(t) \\ \frac{dH}{dt} &= \omega_H I(t) - (\nu_H + \gamma_H + \delta_H)H(t) \\ \frac{dR}{dt} &= (\gamma_A + \delta_A)A(t) + (\gamma_I + \delta_I)I(t) + (\gamma_Q + \delta_Q)Q(t) + (\gamma_H + \delta_H)H(t) \\ \frac{dx_S}{dt} &= \kappa_S x_S(t)(1 - x_S(t))[I(t) + Q(t) + H(t) - \varepsilon_S L_S(t)] \\ \frac{dL_S}{dt} &= \alpha_s C(t) - \xi_S L_S(t) \\ \frac{dx_I}{dt} &= \kappa_I x_I(t)(1 - x_I(t))[\delta_I I(t) + \delta_Q Q(t) + \delta_H H(t) - \varepsilon_I] \end{aligned} \quad (15)$$

612 The game-theoretic model of dynamic human behavior state variables and parameters  
 613 are summarized in Table 2.

Table 2: The dynamic human behavior model state variables and parameters

| Variable           | Description                                                         |
|--------------------|---------------------------------------------------------------------|
| $x_S(t)$           | Proportion of susceptible individuals who support closure           |
| $x_I(t)$           | Proportion of symptomatically infected individuals who self-isolate |
| $C(t)$             | Impact of school and workplace closures                             |
| $L_S(t)$           | Accumulated socio-economic losses due to closures                   |
| Parameter          | Description                                                         |
| $\kappa_S$         | Support for closure social learning rate                            |
| $\kappa_I$         | Self-isolation social learning rate                                 |
| $\varepsilon_S$    | Sensitivity to socio-economic losses relative to COVID-19 infection |
| $\varepsilon_I$    | Sensitivity to self-isolation relative to infecting others          |
| $t_{\text{close}}$ | Initial time closures may take effect                               |
| $C_0$              | Effectiveness of the closure measures                               |
| $\alpha_S$         | Closure impact rate on socio-economic health                        |
| $\xi_S$            | Decay rate for socio-economic losses                                |

614

### 4.3 Data and model fitting

615

We obtained COVID-19 cumulative number of cases data for Arizona, for a period of time from January 26 to July 6, 2020, from the Johns Hopkins website [31] and fitted it to the baseline COVID-19 model (1) to estimate the values of the model parameters; see Figure 12.

616

617

618

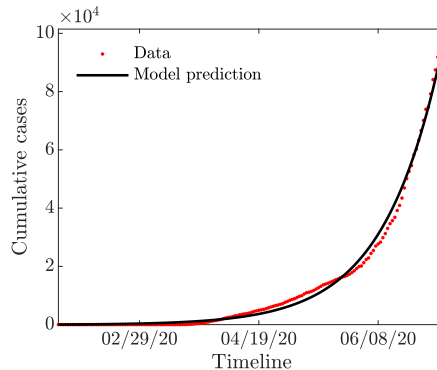

Figure 12: Fitting the baseline COVID-19 model parameters (1) to Arizona data of reported cumulative new cases. The COVID-19 outbreaks data are obtained from Johns Hopkins website [31].

619

The values of the baseline model parameters are summarized in Table 3. We used these values to estimate the value of  $\mathcal{R}_0$  for the COVID-19 outbreak in Arizona as  $\mathcal{R}_0 \approx 1.84$ .

620

621

Table 3: Parameters values for the baseline COVID-19 model (1) fitted to Arizona.

| Parameter  | Description                                        | Value   | References |
|------------|----------------------------------------------------|---------|------------|
| $\beta$    | Infection rate                                     | 0.4712  | Fitted     |
| $\eta_A$   | Asymptomatic infection rate modification parameter | 0.45    | [9]        |
| $\eta_Q$   | Quarantined infection rate modification parameter  | 0.0101  | Fitted     |
| $\eta_H$   | Hospitalized infection rate modification parameter | 0.4509  | Fitted     |
| $q$        | Proportion developing asymptomatic infections      | 0.5     | [9]        |
| $\sigma$   | Disease progression rate                           | 1/6     | [9]        |
| $\gamma_I$ | Recovery rates of symptomatic                      | 0.5997  | Fitted     |
| $\gamma_A$ | Recovery rates of asymptomatic                     | 0.2363  | Fitted     |
| $\gamma_Q$ | Recovery rates of quarantined                      | 0.3815  | Fitted     |
| $\gamma_H$ | Recovery rates of hospitalized                     | 0.0107  | Fitted     |
| $\omega_Q$ | Quarantine rate                                    | 0.5326  | Fitted     |
| $\omega_H$ | Hospitalization rate                               | 0.7495  | Fitted     |
| $\nu_Q$    | Quarantine violation rate                          | 0.4586  | Fitted     |
| $\nu_H$    | Hospital discharge rate                            | 0.0126  | [9]        |
| $\delta_I$ | Death rate of symptomatic                          | 0.0065  | Fitted     |
| $\delta_A$ | Death rate of asymptomatic                         | 0.00325 | Assumed    |
| $\delta_Q$ | Death rate of quarantined                          | 0.0065  | [9]        |
| $\delta_H$ | Death rate of hospitalized                         | 0.0065  | [9]        |

## Acknowledgements

This research is supported by the National Science Foundation under grant number DMS 2028297. FBA would like to thank Chris Bauch for sharing their second wave imitation dynamics code.

## References

- [1] Mike Baker and Sheri Fink. At the top of the COVID-19 curve, how do hospitals decide who gets treatment? <https://www.nytimes.com/2020/03/31/us/coronavirus-covid-triage-rationing-ventilators.html>, 2020. Accessed July 19, 2020.
- [2] Chris T. Bauch. Imitation dynamics predict vaccinating behaviour. *Proceedings of the Royal Society B: Biological Sciences*, 272(1573):1669–1675, 2005.
- [3] Chris T. Bauch and Samit Bhattacharyya. Evolutionary game theory and social learning can determine how vaccine scares unfold. *PLoS computational biology*, 8(4), 2012.
- [4] Begley, Sharon. Once widely criticized, the wuhan quarantine bought the world time to prepare for covid-19. <https://www.statnews.com/2020/02/21/coronavirus-wuhan-quarantine-bought-world-time> 2020. Accessed August 23, 2020.
- [5] Jonathan Borak. Airborne transmission of COVID-19. *Occupational Medicine*, 2020.



642  
643  
644  
645  
646  
647  
648  
649  
650  
651  
652  
653  
654  
655  
656  
657  
658  
659  
660  
661  
662  
663  
664  
665  
666  
667  
668  
669  
670  
671  
672  
673  
674  
675  
676  
677  
678  
679  
680  
681  
682  
683  
684  
685  
686

- [6] Jonah Engel Bromwich. Fighting over masks in public is the new american pastime.  
<https://www.nytimes.com/2020/06/30/style/mask-america-freedom-coronavirus.html>, 2020. Accessed August 4, 2020.
- [7] Christina Carrega. Man on Hawaiian vacation arrested, charged with breaking quarantine rules.  
<https://abcnews.go.com/US/man-hawaiian-vacation-arrested-charged-breaking-quarantine-story?id=70720638>, 2020. Accessed July 18, 2020.
- [8] Centers for Disease Prevention and Control. Considerations for wearing masks.  
[https://www.cdc.gov/coronavirus/2019-ncov/prevent-getting-sick/cloth-face-cover-guidance.html?CDC\\_AA\\_refVal=https%3A%2F%2Fwww.cdc.gov%2Fcoronavirus%2F2019-ncov%2Fprevent-getting-sick%2Fcloth-face-cover.html](https://www.cdc.gov/coronavirus/2019-ncov/prevent-getting-sick/cloth-face-cover-guidance.html?CDC_AA_refVal=https%3A%2F%2Fwww.cdc.gov%2Fcoronavirus%2F2019-ncov%2Fprevent-getting-sick%2Fcloth-face-cover.html), 2020. Accessed August 4, 2020.
- [9] Centers for Disease Prevention and Control. COVID-19 pandemic planning scenarios.  
<https://www.cdc.gov/coronavirus/2019-ncov/hcp/planning-scenarios.html>, 2020. Accessed August 8, 2020.
- [10] Centers for Disease Prevention and Control (CDC). Guidance for cleaning and disinfecting public spaces, workplaces, businesses, schools, and homes. <https://www.cdc.gov/coronavirus/2019-ncov/community/cleaning-disinfecting-decision-tool.html>, 2020. Accessed August 30, 2020.
- [11] Centers for Disease Prevention and Control (CDC). Interim clinical guidance for management of patients with confirmed coronavirus disease (covid-19).  
<https://www.cdc.gov/coronavirus/2019-ncov/hcp/clinical-guidance-management-patients.html>, 2020. Accessed July 19, 2020.
- [12] Centers for Disease Prevention and Control (CDC). Interim guidance for businesses and employers responding to coronavirus disease 2019 (covid-19), may 2020.  
<https://www.cdc.gov/coronavirus/2019-ncov/community/guidance-business-response.html>, 2020. Accessed July 19, 2020.
- [13] Centers for Disease Prevention and Control (CDC). Social distancing.  
<https://www.cdc.gov/coronavirus/2019-ncov/prevent-getting-sick/social-distancing.html>, 2020. Accessed July 19, 2020.
- [14] Centers for Disease Prevention and Control (CDC). Symptoms of coronavirus.  
<https://www.cdc.gov/coronavirus/2019-ncov/symptoms-testing/symptoms.html>, 2020. Accessed July 19, 2020.
- [15] Inyoung Choi. A Kentucky couple refused to sign self-quarantine papers after testing positive for coronavirus. now they have to wear ankle monitors.  
<https://www.insider.com/couple-who-refused-to-self-quarantine-papers-wear-ankle-monitors>, 2020. Accessed July 19, 2020.
- [16] COVID, CDC and Team, Response. Severe outcomes among patients with coronavirus disease 2019 (covid-19) united states, february 12–march 16, 2020. *MMWR Morb Mortal Wkly Rep*, 69(12):343–346, 2020.

687  
688  
689  
690  
691  
692  
693  
694  
695  
696  
697  
698  
699  
700  
701  
702  
703  
704  
705  
706  
707  
708  
709  
710  
711  
712  
713  
714  
715  
716  
717  
718  
719  
720  
721  
722  
723  
724  
725  
726  
727  
728  
729

- [17] Teresa Cowie. New Zealand: man cuts through fence to escape COVID-19 quarantine and buy alcohol.  
<https://www.theguardian.com/world/2020/jul/10/new-zealand-man-cuts-through-fence-to-escape-covid-19-quarantine-and-buy-alcohol>, 2020. Accessed July 18, 2020.
- [18] B.J. Cowling, N.H. Leung, D.K. Chu, E.Y. Shiu, K. Chan, J.J. McDevitt, B.J. Hau, H. Yen, Y. Li, and D.K. Ip. Respiratory virus shedding in exhaled breath and efficacy of face masks.  
<https://www.researchsquare.com/article/rs-16836/v1>, 2020.
- [19] Emily Crane. Man with COVID-19 who was arrested for breaking a mandatory quarantine several times is released because of New York’s bail reform laws.  
<https://www.dailymail.co.uk/news/article-8503873/Man-COVID-19-arrested-breaking-mandatory-quarantine.html>, 2020. Accessed July 18, 2020.
- [20] Zach Crenshaw. Elderly patients with COVID-19 allowed to return to nursing homes with guidelines.  
<https://www.abc15.com/news/state/elderly-patients-with-covid-19-allowed-to-return-> 2020. Accessed August 2, 2020.
- [21] Rachel DeSantis. Hundreds of thousands gather in Missouri to party over holiday weekend amid pandemic.  
<https://people.com/human-interest/thousands-gather-in-missouri-to-party-over-holiday> 2020. Accessed July 18, 2020.
- [22] Odo Diekmann, Johan Andre Peter Heesterbeek, and Johan AJ Metz. On the definition and the computation of the basic reproduction ratio  $r_0$  in models for infectious diseases in heterogeneous populations. *Journal of mathematical biology*, 28(4):365–382, 1990.
- [23] Yuanyuan Dong, Xi Mo, Yabin Hu, Xin Qi, Fang Jiang, Zhongyi Jiang, and Shilu Tong. Epidemiological characteristics of 2143 pediatric patients with 2019 coronavirus disease in china. *Pediatrics*, 2020.
- [24] Emily Feng and Amy Cheng. As china’s wuhan ends its long quarantine, residents feel a mix of joy and fear.  
<https://www.npr.org/2020/04/08/829574902/as-chinas-wuhan-ends-its-long-quarantine-residents-feel-a-mix-of-joy-and-fear>, 2020. Accessed July 19, 2020.
- [25] Lauren Frias. A Kentucky resident who was potentially exposed to the coronavirus and refused to self-isolate was forced to wear an ankle monitor.  
[https://www.insider.com/kentucky-residents-refusing-to-self-isolate-put-on-house-arrest-utm\\_source=yahoo.com&utm\\_medium=referral](https://www.insider.com/kentucky-residents-refusing-to-self-isolate-put-on-house-arrest-utm_source=yahoo.com&utm_medium=referral), 2020. Accessed July 19, 2020.
- [26] Zack Friedman. Got coronavirus? new proposal would pay you \$700 to stay home.  
<https://www.forbes.com/sites/zackfriedman/2020/04/30/proposal-coronavirus-covid-isolation-payment/#2f88f5fc6915>, 2020. Accessed August 4, 2020.

- 730 [27] Judith Graham. Coronavirus patients caught in conflict between hospital and  
731 nursing homes.  
732 [https://khn.org/news/coronavirus-patients-caught-in-conflict-between-hospital-and-n](https://khn.org/news/coronavirus-patients-caught-in-conflict-between-hospital-and-nursing-homes/)  
733 2020. Accessed July 19, 2020.
- 734 [28] Gunia, Amy. Millennials aren't taking coronavirus seriously, a top who official  
735 warns.  
736 <https://time.com/5807073/millennials-coronavirus-who/>, 2020. Ac-  
737 cessed March 25, 2020.
- 738 [29] J. Hofbauer and K. Sigmund. *Evolutionary Games and Population Dynamics*.  
739 Cambridge University Press, 1998.
- 740 [30] Umair Irfan. At the top of the COVID-19 curve, how do hospitals decide who  
741 gets treatment?  
742 <https://www.vox.com/2020/6/9/21284087/coronavirus-covid-19-shutdown-lockdown-cases>  
743 2020. Accessed July 19, 2020.
- 744 [31] Johns Hopkins University. COVID-19 data repository by the center for systems  
745 science and engineering (csse).  
746 <https://github.com/CSSEGISandData/COVID-19>, 2020. Accessed July 19,  
747 2020.
- 748 [32] Chuanyuan Kang, Fu Meng, Qiang Feng, Jing Yuan, Liang Liu, Li Xu, Shuran  
749 Yang, Yujun Wei, Xudong Zhao, and Jianzhong Yang. Implementation of quar-  
750 antine in china during the outbreak of covid-19. *Psychiatry Research*, 289:113038,  
751 2020.
- 752 [33] Amit Katwala. Shaming reveals the tricky science of social change.  
753 <https://www.wired.co.uk/article/mask-shaming>, 2020. Accessed August  
754 4, 2020.
- 755 [34] Nancy HL Leung, Daniel KW Chu, Eunice YC Shiu, Kwok-Hung Chan, James J  
756 McDevitt, Benien JP Hau, Hui-Ling Yen, Yuguo Li, Dennis KM Ip, JS Malik  
757 Peiris, et al. Respiratory virus shedding in exhaled breath and efficacy of face  
758 masks. *Nature medicine*, 26(5):676–680, 2020.
- 759 [35] Arwa Mahdawi. Shaming people who refuse to wear face masks isnt a good look.  
760 [https://www.theguardian.com/commentisfree/2020/jul/22/](https://www.theguardian.com/commentisfree/2020/jul/22/shaming-people-who-refuse-to-wear-face-masks-isnt-a-good-look)  
761 [shaming-people-who-refuse-to-wear-face-masks-isnt-a-good-look](https://www.theguardian.com/commentisfree/2020/jul/22/shaming-people-who-refuse-to-wear-face-masks-isnt-a-good-look),  
762 2020. Accessed August 4, 2020.
- 763 [36] Rod Meloni and Derick Hutchinson. Michigan Gov. Whitmer defends placing  
764 COVID-19 patients in nursing homes with healthy residents.  
765 [https://www.clickondetroit.com/news/local/2020/06/16/](https://www.clickondetroit.com/news/local/2020/06/16/michigan-gov-whitmer-defends-placing-covid-19-patients-in-nursing-homes-with-healthy-residents/)  
766 [michigan-gov-whitmer-defends-placing-covid-19-patients-in-nursing-homes-with-healthy](https://www.clickondetroit.com/news/local/2020/06/16/michigan-gov-whitmer-defends-placing-covid-19-patients-in-nursing-homes-with-healthy-residents/)  
767 2020. Accessed July 18, 2020.
- 768 [37] Mid-Michigan NOW Newsroom. Whitmer vetoes bill that would have prevented  
769 COVID-19 patients housed in nursing homes.  
770 [https://nbc25news.com/news/local/gov-whitmer-vetoes-bill-to-preven-covid-19-patien](https://nbc25news.com/news/local/gov-whitmer-vetoes-bill-to-preven-covid-19-patients-housed-in-nursing-homes/)  
771 2020. Accessed August 12 2020.
- 772 [38] W. Ryan Miller. Break a coronavirus quarantine in the us? yes, you could face  
773 jail time.

774  
775  
776  
777  
778  
779  
780  
781  
782  
783  
784  
785  
786  
787  
788  
789  
790  
791  
792  
793  
794  
795  
796  
797  
798  
799  
800  
801  
802  
803  
804  
805  
806  
807  
808  
809  
810  
811  
812  
813  
814  
815  
816

- <https://www.usatoday.com/story/news/health/2020/03/10/coronavirus-quarantine-breaking-public-health-order-jail-fine/5008588002/>, 2020. Accessed July 18, 2020.
- [39] Scott Neuman. Kentucky has 39 new cases; 1 person attended a 'coronavirus party'.  
<https://www.npr.org/sections/coronavirus-live-updates/2020/03/25/821247412/kentucky-has-39-new-infections-including-1-person-who-attended-a-coronavirus-party>, 2020. Accessed August 4, 2020.
- [40] NPR. With odds against it, taiwan keeps coronavirus corralled.  
<https://www.npr.org/sections/goatsandsoda/2020/03/13/814709530/with-odds-against-it-taiwan-keeps-coronavirus-corralled>, 2020. Accessed July 19, 2020.
- [41] Sansao A Pedro, Frank T. Ndjomatchoua, Peter Jentsch, Jean M. Tcheunche, Madhur Anand, and Chris T. Bauch. Conditions for a second wave of covid-19 due to interactions between disease dynamics and social processes. *medRxiv*, 2020.
- [42] Eskild Petersen, Marion Koopmans, Unyeong Go, Davidson H Hamer, Nicola Petrosillo, Francesco Castelli, Merete Storgaard, Sulien Al Khalili, and Lone Simonsen. Comparing sars-cov-2 with sars-cov and influenza pandemics. *The Lancet Infectious Diseases*, 2020.
- [43] Piero Poletti, Marco Ajelli, and Stefano Merler. The effect of risk perception on the 2009 h1n1 pandemic influenza dynamics. *PloS one*, 6(2), 2011.
- [44] Piero Poletti, Marco Ajelli, and Stefano Merler. Risk perception and effectiveness of uncoordinated behavioral responses in an emerging epidemic. *Mathematical Biosciences*, 238(2):80–89, 2012.
- [45] Kiran Saini. It's just plain false.' state did not order nursing homes to take COVID-19 patients, whitmer says.  
<https://www.wxyz.com/news/coronavirus/its-just-plain-false-state-did-not-order-nursing-homes-to-take-covid-19-patients-whitmer-says>, 2020. Accessed July 18, 2020.
- [46] Jenn Selva. A california security guard was charged with murder after fighting with a customer over face mask rules.  
<https://www.cnn.com/2020/07/09/us/california-guard-murder-face-mask/index.html>, 2020. Accessed August 4, 2020.
- [47] Marina Starleaf Riker and Brian Chasnoff. When were full, were full: COVID-19 pushes san antonio hospitals to the limit.  
<https://www.expressnews.com/news/local/politics/article/When-we-re-full-we-re-full-COVID-19-15386144.php>, 2020. Accessed July 19, 2020.
- [48] Pauline Van den Driessche and James Watmough. Reproduction numbers and sub-threshold endemic equilibria for compartmental models of disease transmission. *Mathematical biosciences*, 180(1-2):29–48, 2002.
- [49] Theresa Waldrop and Stephanie Gallman. A group of young adults held a coronavirus party in kentucky to defy orders to socially distance. now one of them has coronavirus.

- 817 [https://www.cnn.com/2020/03/24/health/kentucky-coronavirus-party-infection/](https://www.cnn.com/2020/03/24/health/kentucky-coronavirus-party-infection/index.html)  
818 [index.html](https://www.cnn.com/2020/03/24/health/kentucky-coronavirus-party-infection/index.html), 2020. Accessed July 18, 2020.
- 819 [50] C Jason Wang, Chun Y Ng, and Robert H Brook. Response to COVID-19  
820 in taiwan: big data analytics, new technology, and proactive testing. *Jama*,  
821 323(14):1341–1342, 2020.
- 822 [51] Deutsche Welle. How has taiwan kept its coronavirus infection rate so low?  
823 <https://www.dw.com/en/taiwan-coronavirus/a-52724523>, 2020. Accessed  
824 July 19, 2020.
- 825 [52] Annelies Wilder-Smith, Calvin J. Chiew, and Vernon J. Lee. Can we contain the  
826 COVID-19 outbreak with the same measures as for sars? *The Lancet Infectious*  
827 *Diseases*, 2020.
- 828 [53] World Health Organization (WHO). Transmission of sars-cov-2: implications for  
829 infection prevention precautions.  
830 [https://www.who.int/news-room/commentaries/detail/](https://www.who.int/news-room/commentaries/detail/transmission-of-sars-cov-2-implications-for-infection-prevention-precautions)  
831 [transmission-of-sars-cov-2-implications-for-infection-prevention-precautions](https://www.who.int/news-room/commentaries/detail/transmission-of-sars-cov-2-implications-for-infection-prevention-precautions),  
832 2020. Accessed July 18, 2020.
- 833 [54] Shi Zhao, Lewi Stone, Daozhou Gao, Salihu S Musa, Marc KC Chong, Daihai  
834 He, and Maggie H Wang. Imitation dynamics in the mitigation of the novel  
835 coronavirus disease (covid-19) outbreak in wuhan, china from 2019 to 2020. *Annals*  
836 *of Translational Medicine*, 8(7), 2020.

837

## A Appendix A: Contour plots of the COVID-19 reproduction number $\mathcal{R}_0$

838

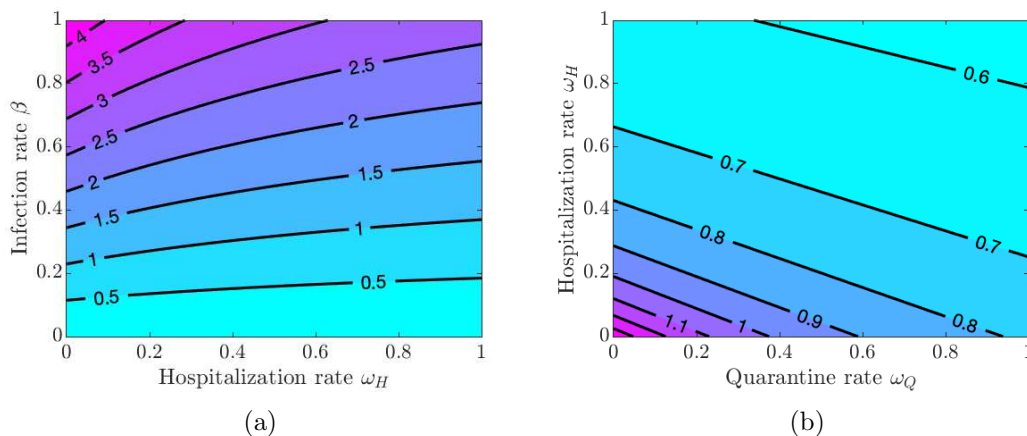

Figure 13: Contour plot of the COVID-19 reproduction number  $\mathcal{R}_0$  given in equation (1). (a) Varying hospitalization rate  $\omega_H$  and infection rate  $\beta$ . (b) Varying quarantine rate  $\omega_Q$  and hospitalization rate  $\omega_H$  using infection rate  $\beta = 0.22$ .

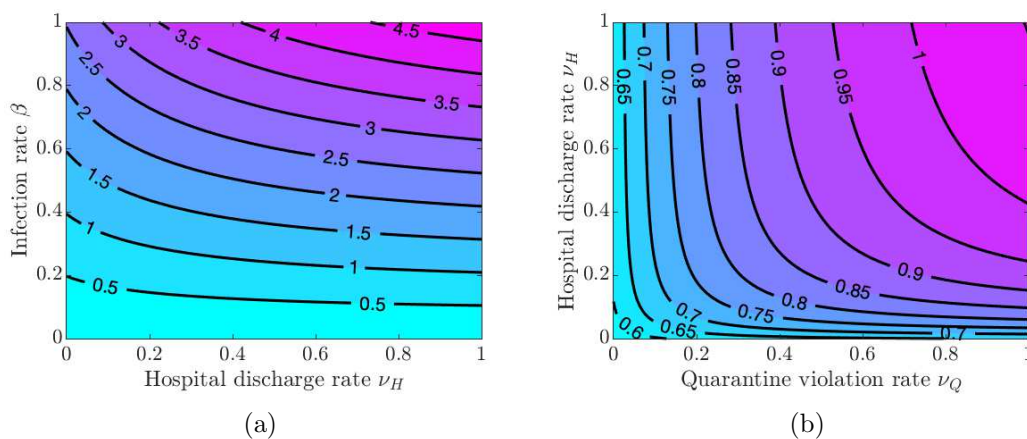

Figure 14: Contour plot of the COVID-19 reproduction number  $\mathcal{R}_0$  given in equation (1). (a) Varying quarantine violation rate  $\nu_Q$  and infection rate  $\beta$ . (b) Varying quarantine violation rate  $\nu_Q$  and hospital discharge rate  $\nu_H$  using infection rate  $\beta = 0.22$ .

839 **B Appendix B: Impact of high cost self-isolation**  
 840  **$(\varepsilon_I)$  on symptomatic infectious**

841 Here we show the simulation results for all symptomatic infections with high sensitivity  
 842 to self-isolation  $\varepsilon_I = 0.00008$ .

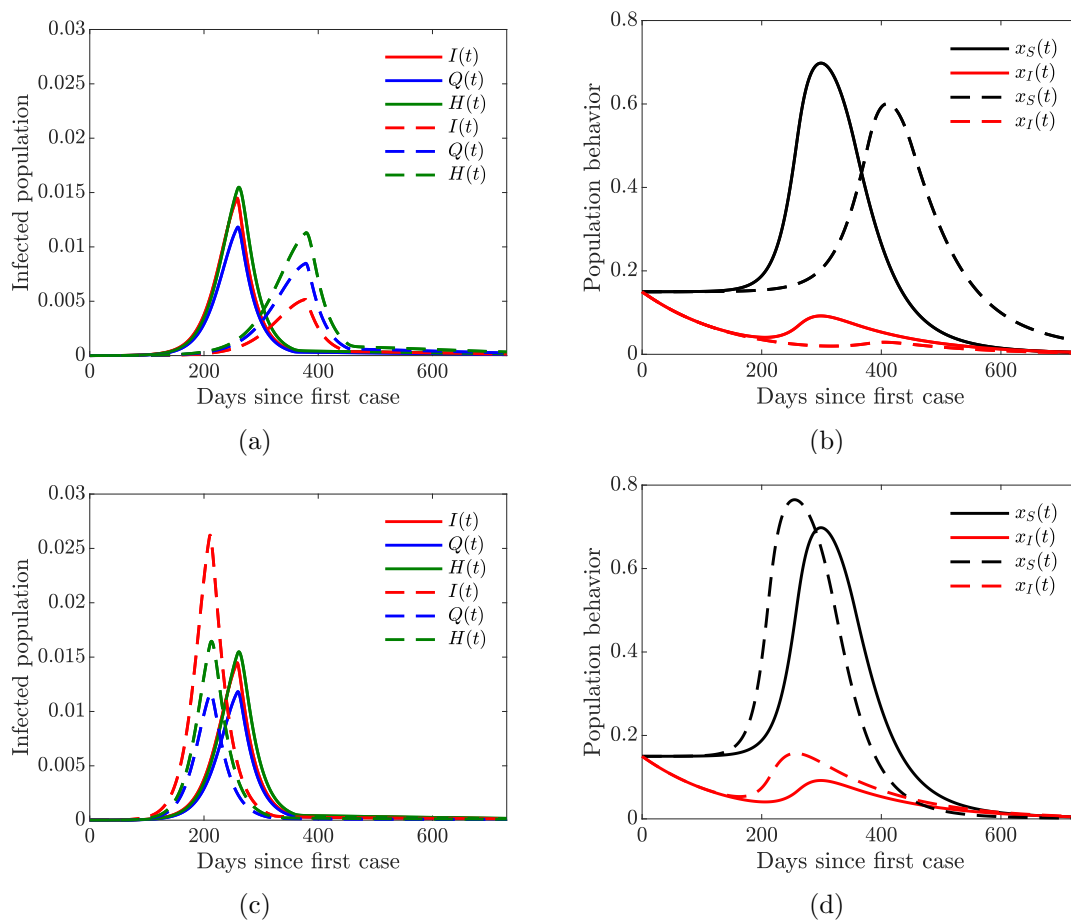

Figure 15: Simulations of the COVID-19 model with dynamic human behavior (15) for the proportions of all symptomatic infections and behavioral response with high sensitivity to self-isolation  $\varepsilon_I = 0.00008$ . The social learning rates are  $\kappa_S = 1$  and  $\kappa_I = 100$ , and  $x_S(0) = x_I(0) = 0.15$ . Solid lines correspond to the values of the baseline model parameters given in Table 3. (a)–(b) Dashed lines correspond to double quarantine ( $\omega_Q$ ) and hospitalization ( $\omega_H$ ) rates (c)–(d) Dashed lines correspond to double quarantine violation ( $\nu_Q$ ) and hospital discharge ( $\nu_H$ ) rates.

843

## C Appendix C: The impact of symptomatic social learning rates $\kappa_I$

844

845

Here we show the simulation results of varying symptomatically infected individuals social learning rate  $\kappa_I$  with high sensitivity to self-isolation  $\varepsilon_I = 0.00008$ .

846

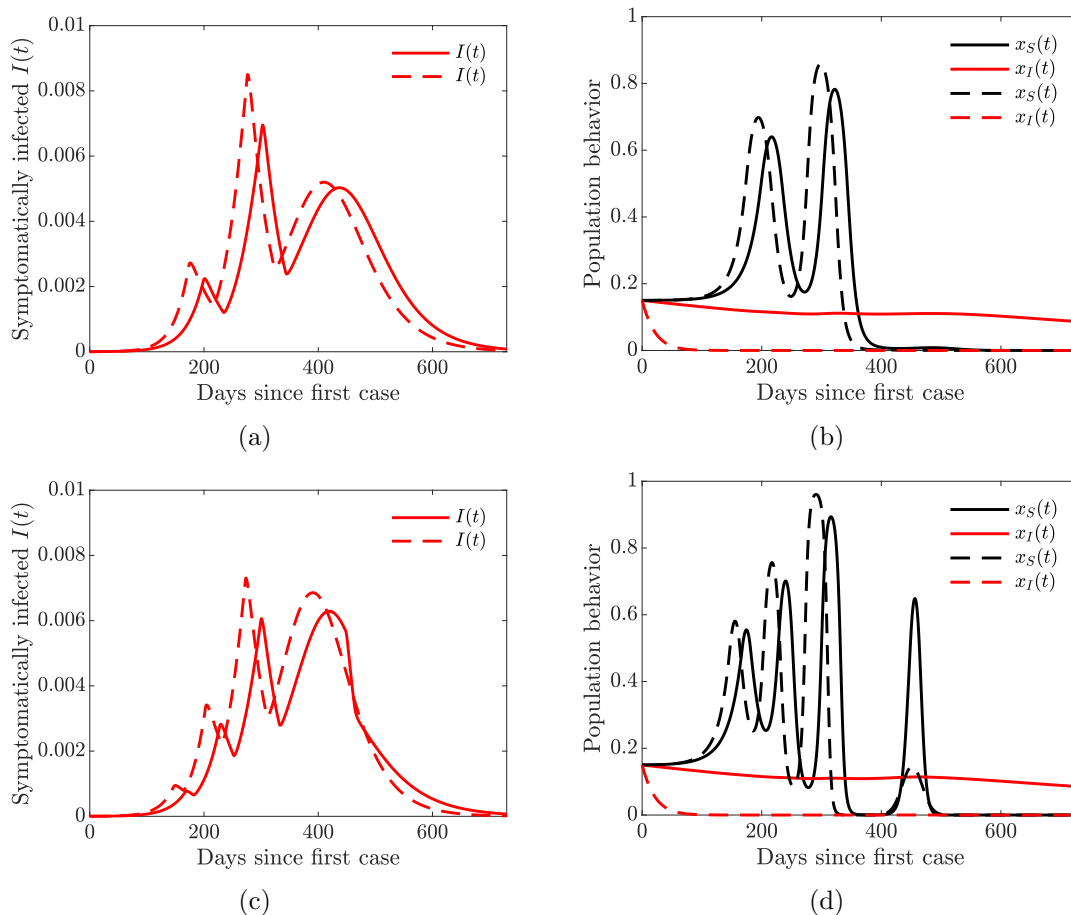

Figure 16: Simulations of the COVID-19 model with dynamic human behavior (15) for the proportions of all symptomatic infections and behavioral response with high sensitivity to self-isolation  $\varepsilon_I = 0.00008$ . Solid lines correspond to  $\kappa_I = 20$ , dashed lines correspond to  $\kappa_I = 650$ . (a)–(b)  $\kappa_S = 10$ ; (c)–(d)  $\kappa_S = 30$ .
